# Supplementary material for: Development of bacterial communities in biological soil crusts alonga revegetation chronosequence in the Tengger Desert, northwest China
Source: Copernicus journal article supplement (doi:10.5194/bg-2017-139), 2017-04-18
Supplement: Supplementary file 2 [file Table S2.xlsx]

## Sheet: otu_taxa_table
Table S2. OTU distribution and shared proportions for 16S rDNA sequences in each sample of BSCs (%). MS, 5YR, 15YR, 28YR, 34YR and 51YR represent mobile sand, 5-, 15-, 28-, 34- and 51-year-old BSCs, respectively. Triplicate samples were analyzed in each age of BSCs.
OTU ID	MS1	MS2	MS3	5YR1	5YR2	5YR3	15YR1	15YR2	15YR3	28YR1	28YR2	28YR3	34YR1	34YR2	34YR3	51YR1	51YR2	51YR3	taxonomy
OTU10	9	16	10	26	25	20	13	9	14	8	9	12	13	9	11	8	10	12	d__Bacteria; p__Proteobacteria; c__Betaproteobacteria; o__Burkholderiales; f__Comamonadaceae; g__Ramlibacter
OTU17	11	10	13	36	10	3	17	11	22	51	25	41	29	28	14	22	18	5	d__Bacteria; p__Actinobacteria; c__Actinobacteria; o__Gaiellales; f__uncultured; g__uncultured; s__uncultured_bacterium
OTU21	5	4	4	8	5	2	2	3	6	3	9	5	3	3	9	2	3	3	d__Bacteria; p__Bacteroidetes; c__Sphingobacteriia; o__Sphingobacteriales; f__Chitinophagaceae; g__Flavisolibacter
OTU28	11	10	8	8	7	6	18	32	29	21	31	36	28	22	29	26	23	12	d__Bacteria; p__Actinobacteria; c__Actinobacteria; o__Frankiales
OTU38	137	96	52	225	151	311	119	327	202	135	151	127	280	151	121	262	197	193	d__Bacteria; p__Actinobacteria; c__Actinobacteria; o__Frankiales; f__Geodermatophilaceae; g__Geodermatophilus; s__uncultured_bacterium
OTU42	11	2	10	12	17	5	33	24	30	31	21	19	32	22	21	33	35	18	d__Bacteria; p__Actinobacteria; c__Actinobacteria; o__Propionibacteriales; f__Nocardioidaceae; g__Nocardioides
OTU48	4	2	5	2	4	1	7	3	10	20	4	3	4	3	2	2	1	2	d__Bacteria; p__Firmicutes; c__Bacilli; o__Bacillales; f__Bacillaceae; g__Bacillus; s__Bacillus_simplex
OTU61	312	206	134	652	395	456	446	780	668	534	592	601	1107	569	684	1025	669	341	d__Bacteria; p__Actinobacteria; c__Actinobacteria; o__Frankiales; f__Geodermatophilaceae; g__Blastococcus
OTU65	65	34	68	42	48	14	128	95	106	151	109	114	126	94	88	97	117	36	d__Bacteria; p__Actinobacteria; c__Actinobacteria; o__Acidimicrobiales; f__uncultured; g__uncultured; s__uncultured_Acidothermaceae_bacterium
OTU72	4	3	2	10	7	8	44	49	17	41	27	22	32	30	15	47	57	17	d__Bacteria; p__Chloroflexi; c__Chloroflexia; o__Chloroflexales; f__Roseiflexaceae; g__Roseiflexus
OTU74	6386	6268	6895	3562	5102	663	970	558	1320	1243	1834	2024	7	1487	2657	5	440	211	d__Bacteria; p__Firmicutes; c__Bacilli; o__Lactobacillales; f__Enterococcaceae; g__Enterococcus
OTU81	4	5	7	7	8	2	14	11	17	9	8	9	4	5	9	4	8	8	d__Bacteria; p__Proteobacteria; c__Alphaproteobacteria; o__Rhizobiales; f__Bradyrhizobiaceae; g__Nitrobacter; s__Nitrobacter_vulgaris
OTU93	38	34	22	69	42	42	133	116	143	88	93	78	154	122	103	160	127	102	d__Bacteria; p__Proteobacteria; c__Alphaproteobacteria; o__Sphingomonadales; f__Sphingomonadaceae; g__Sphingomonas
OTU116	1	2	1	51	19	89	46	42	37	29	14	27	16	26	19	14	12	38	d__Bacteria; p__Chloroflexi; c__Chloroflexia; o__Chloroflexales; f__FFCH7168; g__norank; s__uncultured_bacterium
OTU118	1	3	7	2	8	1	9	6	6	12	7	7	13	12	1	7	7	1	d__Bacteria; p__Acidobacteria; c__Acidobacteria; o__Subgroup_6; f__norank; g__norank
OTU120	4	4	7	21	22	23	148	87	70	56	41	33	108	53	26	182	87	560	d__Bacteria; p__Verrucomicrobia; c__Spartobacteria; o__Chthoniobacterales; f__DA101_soil_group; g__norank; s__uncultured_bacterium
OTU122	3	3	4	1	3	1	12	5	8	12	4	11	7	10	3	4	10	3	d__Bacteria; p__Chloroflexi; c__S085; o__norank; f__norank; g__norank; s__uncultured_soil_bacterium
OTU123	10	7	10	4	13	1	12	2	13	10	5	3	7	3	5	7	7	1	d__Bacteria; p__Proteobacteria; c__Alphaproteobacteria; o__Rhizobiales; f__Rhodobiaceae; g__uncultured; s__uncultured_Rhizobiales_bacterium
OTU126	8	4	5	25	14	5	55	46	54	66	46	51	47	39	49	102	97	37	d__Bacteria; p__Actinobacteria; c__Actinobacteria; o__Solirubrobacterales
OTU129	3	1	2	5	4	9	19	24	14	7	10	13	15	10	15	23	24	16	d__Bacteria; p__Actinobacteria; c__Actinobacteria; o__Propionibacteriales; f__Nocardioidaceae; g__Nocardioides; s__Nocardioides_sp._02SU6
OTU137	8	15	1	34	8	33	82	91	94	63	81	72	111	88	91	117	111	82	d__Bacteria; p__Proteobacteria; c__Alphaproteobacteria; o__Rhizobiales; f__Methylobacteriaceae; g__Methylobacterium
OTU141	6	17	8	20	23	12	8	14	18	14	10	11	21	14	17	17	8	4	d__Bacteria; p__Actinobacteria; c__Actinobacteria; o__Acidimicrobiales; f__uncultured; g__uncultured
OTU147	3	5	2	14	2	1	17	21	21	29	22	26	33	31	33	67	64	31	d__Bacteria; p__Actinobacteria; c__Actinobacteria; o__Euzebyales; f__Euzebyaceae; g__Euzebya; s__uncultured_bacterium
OTU151	3	9	6	22	26	8	36	36	44	39	77	50	44	31	39	57	52	68	d__Bacteria; p__Proteobacteria; c__Alphaproteobacteria; o__Sphingomonadales; f__Sphingomonadaceae
OTU158	8	13	7	21	10	63	20	41	30	28	54	22	45	37	34	41	56	75	d__Bacteria; p__Proteobacteria; c__Alphaproteobacteria; o__Sphingomonadales
OTU165	128	153	90	351	240	475	514	665	689	281	342	258	553	468	505	505	442	496	d__Bacteria; p__Proteobacteria; c__Alphaproteobacteria; o__Rhizobiales; f__Methylobacteriaceae; g__Microvirga
OTU168	3	2	3	6	3	4	9	17	13	4	16	6	13	14	12	14	13	10	d__Bacteria; p__Actinobacteria; c__Actinobacteria; o__Acidimicrobiales; f__uncultured; g__uncultured
OTU190	20	31	19	24	29	29	22	29	24	10	18	16	24	21	36	27	29	17	d__Bacteria; p__Proteobacteria; c__Alphaproteobacteria; o__Rhizobiales; f__Methylobacteriaceae; g__Methylobacterium; s__Methylobacterium_oxalidis
OTU202	3	3	5	7	3	2	5	5	5	9	6	15	13	11	11	20	11	2	d__Bacteria; p__Actinobacteria; c__Actinobacteria; o__Gaiellales; f__Gaiellaceae; g__Gaiella; s__uncultured_actinobacterium
OTU222	88	97	77	41	65	7	14	7	11	15	31	20	41	15	34	39	4	4	d__Bacteria; p__Proteobacteria; c__Gammaproteobacteria; o__Pseudomonadales; f__Pseudomonadaceae; g__Pseudomonas
OTU226	15	12	46	35	37	14	81	57	52	17	17	30	54	99	26	66	79	40	d__Bacteria; p__Acidobacteria; c__Acidobacteria; o__Subgroup_4; f__RB41; g__norank; s__uncultured_bacterium
OTU230	17	13	20	19	25	15	27	22	26	30	32	29	24	16	12	19	16	19	d__Bacteria; p__Actinobacteria; c__Actinobacteria; o__Propionibacteriales; f__Nocardioidaceae; g__Kribbella; s__Kribbella_sandramycini
OTU233	12	7	6	16	8	6	9	20	18	15	15	17	21	12	12	23	20	7	d__Bacteria; p__Actinobacteria; c__Actinobacteria; o__Solirubrobacterales; f__Solirubrobacteraceae; g__Solirubrobacter; s__uncultured_actinobacterium
OTU234	16	12	4	39	19	26	87	95	122	77	76	59	69	56	61	52	72	47	d__Bacteria; p__Proteobacteria; c__Alphaproteobacteria; o__Rhizobiales
OTU235	2	3	2	4	3	4	9	14	7	6	9	3	6	9	3	5	10	2	d__Bacteria; p__Actinobacteria; c__Actinobacteria; o__Acidimicrobiales; f__uncultured; g__uncultured; s__uncultured_actinobacterium
OTU247	38	33	57	113	100	22	130	96	57	184	160	203	122	95	41	98	76	36	d__Bacteria; p__Chloroflexi; c__Gitt-GS-136; o__norank; f__norank; g__norank; s__uncultured_bacterium
OTU249	13	7	32	21	18	7	25	22	47	94	89	61	66	44	63	68	91	41	d__Bacteria; p__Actinobacteria; c__Actinobacteria; o__Pseudonocardiales; f__Pseudonocardiaceae; g__Lechevalieria; s__Lechevalieria_aerocolonigenes
OTU254	3	1	1	2	1	1	2	1	5	3	2	3	5	4	6	3	4	1	d__Bacteria; p__Nitrospirae; c__Nitrospira; o__norank; f__norank; g__Nitrospira
OTU260	5	4	2	15	9	1	56	67	55	61	51	54	45	49	55	40	51	28	d__Bacteria; p__Actinobacteria; c__Actinobacteria; o__Solirubrobacterales; f__0319-6M6; g__norank
OTU267	1	3	1	2	2	5	17	16	20	7	7	15	36	15	25	34	33	30	d__Bacteria; p__Bacteroidetes; c__Sphingobacteriia; o__Sphingobacteriales; f__Chitinophagaceae; g__Flavisolibacter; s__uncultured_bacterium
OTU268	5	9	13	85	196	185	10	9	8	6	7	6	44	9	9	16	13	9	d__Bacteria; p__Actinobacteria; c__Actinobacteria; o__Micrococcales; f__Micrococcaceae; g__Arthrobacter; s__Arthrobacter_agilis
OTU271	4	4	5	10	12	3	19	23	18	12	20	21	23	13	17	23	22	14	d__Bacteria; p__Actinobacteria; c__Actinobacteria; o__Acidimicrobiales; f__uncultured; g__uncultured
OTU278	374	292	310	163	216	43	49	21	51	63	97	86	6	79	106	2	17	8	d__Bacteria; p__Firmicutes; c__Bacilli; o__Lactobacillales; f__Streptococcaceae; g__Lactococcus
OTU279	2	3	10	10	9	4	5	5	3	13	5	7	4	6	3	5	2	3	d__Bacteria; p__Acidobacteria; c__Acidobacteria; o__Subgroup_6; f__norank; g__norank
OTU283	3	2	8	3	10	4	10	11	5	22	19	21	24	16	5	25	5	2	d__Bacteria; p__Chloroflexi; c__KD4-96; o__norank; f__norank; g__norank; s__uncultured_bacterium
OTU294	40	21	21	49	44	17	60	70	58	93	69	79	101	60	73	122	80	89	d__Bacteria; p__Actinobacteria; c__Actinobacteria; o__Solirubrobacterales; f__Solirubrobacteraceae; g__Solirubrobacter
OTU314	2	4	9	7	14	2	4	3	1	3	7	5	4	6	2	2	5	2	d__Bacteria; p__Chloroflexi; c__Ktedonobacteria; o__C0119; f__norank; g__norank
OTU322	2	4	9	8	17	20	148	121	85	36	35	55	73	76	35	38	35	12	d__Bacteria; p__Acidobacteria; c__Acidobacteria; o__Subgroup_4; f__RB41; g__norank
OTU326	6	4	1	7	1	3	2	2	1	4	2	3	4	4	3	1	5	13	d__Bacteria; p__Chloroflexi; c__Chloroflexia; o__Kallotenuales; f__AKIW781; g__norank; s__uncultured_bacterium
OTU327	1	4	6	2	3	3	7	7	3	6	12	11	9	14	2	10	8	7	d__Bacteria; p__Acidobacteria; c__Acidobacteria; o__Subgroup_6; f__norank; g__norank
OTU328	21	12	7	24	35	11	7	6	7	45	12	26	29	7	22	33	22	11	d__Bacteria; p__Actinobacteria; c__Actinobacteria; o__Acidimicrobiales
OTU339	3	7	1	4	9	3	6	4	7	6	9	9	6	6	5	3	5	2	d__Bacteria; p__Actinobacteria; c__Actinobacteria; o__Acidimicrobiales; f__Acidimicrobiaceae; g__CL500-29_marine_group
OTU353	115	154	93	530	358	492	811	852	1043	1021	930	831	1227	847	1004	1269	1422	1329	d__Bacteria; p__Proteobacteria; c__Alphaproteobacteria; o__Sphingomonadales; f__JG34-KF-161; g__norank
OTU358	44	158	152	51	86	11	20	14	14	27	19	22	27	16	13	10	16	2	d__Bacteria; p__Actinobacteria; c__Actinobacteria; o__norank; f__norank; g__norank
OTU375	6	1	19	3	6	2	3	5	4	18	9	5	14	12	29	11	7	3	d__Bacteria; p__Actinobacteria; c__Actinobacteria; o__Propionibacteriales; f__Nocardioidaceae; g__Nocardioides
OTU376	5	18	8	15	9	2	13	7	4	16	21	17	16	31	20	26	32	6	d__Bacteria; p__Chloroflexi; c__KD4-96; o__norank; f__norank; g__norank; s__uncultured_Chloroflexi_bacterium
OTU399	8	4	4	4	7	5	13	18	10	12	8	13	15	13	12	30	25	14	d__Bacteria; p__Actinobacteria; c__Actinobacteria; o__Propionibacteriales; f__Nocardioidaceae; g__Nocardioides
OTU410	10	8	14	4	11	2	32	24	24	35	39	31	45	37	35	32	33	18	d__Bacteria; p__Proteobacteria; c__Alphaproteobacteria; o__Rhizobiales; f__Xanthobacteraceae; g__Variibacter
OTU411	2	3	1	9	5	3	16	16	33	34	22	32	17	9	14	17	13	3	d__Bacteria; p__Actinobacteria; c__Actinobacteria; o__Solirubrobacterales; f__norank; g__norank; s__uncultured_bacterium
OTU423	11	7	7	33	22	93	27	93	63	27	53	48	69	38	47	65	55	132	d__Bacteria; p__Proteobacteria; c__Alphaproteobacteria; o__Rhodospirillales; f__Acetobacteraceae; g__Belnapia
OTU444	4	4	7	5	8	4	10	8	13	8	5	5	3	8	7	6	15	4	d__Bacteria; p__Proteobacteria; c__Alphaproteobacteria; o__Rhodospirillales; f__Rhodospirillaceae; g__Defluviicoccus; s__uncultured_Acetobacteraceae_bacterium
OTU456	12	11	6	39	50	198	18	13	7	22	12	15	7	24	20	7	22	10	d__Bacteria; p__Deinococcus-Thermus; c__Deinococci; o__Deinococcales; f__Trueperaceae; g__Truepera; s__uncultured_Deinococcales_bacterium
OTU462	1	3	1	2	2	3	5	12	5	2	4	2	11	5	7	9	8	19	d__Bacteria; p__Actinobacteria; c__Actinobacteria; o__Solirubrobacterales
OTU478	3	4	1	24	9	26	94	115	102	101	64	59	120	98	83	155	161	127	d__Bacteria; p__Proteobacteria; c__Alphaproteobacteria; o__Caulobacterales; f__Caulobacteraceae; g__uncultured
OTU480	3	1	5	33	11	8	11	11	13	1	4	3	4	5	4	3	4	1	d__Bacteria; p__Saccharibacteria; c__norank; o__norank; f__norank; g__norank
OTU494	4	5	7	4	10	4	4	6	5	12	16	16	6	19	8	6	4	4	d__Bacteria; p__Acidobacteria; c__Acidobacteria; o__Subgroup_6; f__norank; g__norank; s__Acidobacteria_bacterium_IGE-005
OTU497	2	3	2	6	7	3	20	19	29	11	12	13	6	14	7	11	15	8	d__Bacteria; p__Chloroflexi; c__Thermomicrobia; o__AKYG1722; f__norank; g__norank; s__uncultured_bacterium
OTU500	10	5	23	4	3	2	4	2	5	9	5	9	8	5	6	4	3	5	d__Bacteria; p__Proteobacteria; c__Alphaproteobacteria; o__Rhizobiales; f__Rhizobiaceae; g__Rhizobium
OTU513	2	4	2	2	3	1	8	17	24	4	3	1	8	8	5	9	6	6	d__Bacteria; p__Acidobacteria; c__Acidobacteria; o__Subgroup_3; f__Unknown_Family; g__Bryobacter; s__uncultured_bacterium
OTU535	3	3	1	10	7	6	17	7	11	7	2	3	10	8	6	7	4	5	d__Bacteria; p__Chloroflexi; c__Chloroflexia; o__Kallotenuales; f__AKIW781; g__norank
OTU540	7	2	19	5	5	2	34	19	23	195	48	47	4	6	4	16	20	1	d__Bacteria; p__Acidobacteria; c__Acidobacteria; o__Subgroup_10; f__ABS-19; g__norank; s__uncultured_bacterium
OTU548	2	1	2	3	4	15	11	33	12	10	11	6	9	6	8	1	6	4	d__Bacteria; p__Proteobacteria; c__Alphaproteobacteria; o__Rhizobiales
OTU556	2	2	1	2	3	3	14	9	4	15	9	5	10	10	11	9	5	2	d__Bacteria; p__Chloroflexi; c__Caldilineae; o__Caldilineales; f__Caldilineaceae; g__uncultured
OTU572	26	28	14	154	79	240	286	341	324	288	235	190	270	230	191	202	216	134	d__Bacteria; p__Actinobacteria; c__Actinobacteria; o__Rubrobacterales; f__Rubrobacteriaceae; g__Rubrobacter; s__uncultured_bacterium
OTU578	2	4	9	12	12	20	19	69	49	28	26	19	38	24	30	51	43	19	d__Bacteria; p__Actinobacteria; c__Actinobacteria; o__Micromonosporales; f__Micromonosporaceae; g__Micromonospora
OTU579	2	2	10	7	13	2	15	10	12	14	22	25	18	18	10	17	23	13	d__Bacteria; p__Acidobacteria; c__Acidobacteria; o__Subgroup_6; f__norank; g__norank
OTU588	2	2	7	10	1	1	14	14	10	17	13	15	20	11	9	12	16	8	d__Bacteria; p__Chloroflexi; c__JG30-KF-CM66; o__norank; f__norank; g__norank; s__uncultured_Chloroflexi_bacterium
OTU601	13	8	10	23	25	10	3	14	8	24	17	8	10	8	4	4	4	4	d__Bacteria; p__Actinobacteria; c__Actinobacteria; o__Micrococcales; f__Intrasporangiaceae; g__Knoellia; s__uncultured_bacterium
OTU603	65	26	39	34	35	11	25	24	33	71	50	52	61	41	38	24	28	3	d__Bacteria; p__Actinobacteria; c__Actinobacteria; o__Streptomycetales; f__Streptomycetaceae; g__Streptomyces
OTU604	8	8	1	13	9	4	8	2	5	3	1	1	4	6	5	2	2	3	d__Bacteria; p__Proteobacteria; c__Alphaproteobacteria; o__Rhodospirillales; f__Acetobacteraceae; g__uncultured; s__uncultured_Paracraurococcus_sp.
OTU610	3	1	7	7	8	1	23	9	24	8	6	14	20	14	22	8	10	2	d__Bacteria; p__Gemmatimonadetes; c__Gemmatimonadetes; o__AT425-EubC11_terrestrial_group; f__norank; g__norank
OTU614	5	7	5	5	1	2	15	14	20	10	6	4	6	5	11	10	11	11	d__Bacteria; p__Acidobacteria; c__Acidobacteria; o__Subgroup_3; f__Unknown_Family; g__Bryobacter; s__uncultured_bacterium
OTU616	27	14	13	22	21	6	43	51	63	25	38	34	29	43	31	34	34	11	d__Bacteria; p__Actinobacteria; c__Actinobacteria; o__Solirubrobacterales
OTU626	3	2	3	5	7	8	29	47	57	26	29	27	31	37	32	55	61	45	d__Bacteria; p__Actinobacteria; c__Actinobacteria; o__Propionibacteriales; f__Nocardioidaceae; g__Marmoricola; s__uncultured_bacterium
OTU632	5	13	13	14	18	4	22	30	22	15	17	15	50	21	39	109	40	37	d__Bacteria; p__Actinobacteria; c__Actinobacteria; o__Corynebacteriales; f__Mycobacteriaceae; g__Mycobacterium
OTU642	17	18	6	18	15	4	10	14	19	32	18	27	18	23	21	25	23	7	d__Bacteria; p__Actinobacteria; c__Actinobacteria; o__Acidimicrobiales; f__uncultured; g__uncultured; s__uncultured_bacterium
OTU645	11	15	10	45	27	71	22	50	40	41	27	39	68	26	28	95	52	41	d__Bacteria; p__Actinobacteria; c__Actinobacteria; o__Kineosporiales; f__Kineosporiaceae
OTU646	27	18	22	31	26	4	29	13	24	57	34	51	31	39	30	28	17	6	d__Bacteria; p__Gemmatimonadetes; c__Gemmatimonadetes; o__Gemmatimonadales; f__Gemmatimonadaceae; g__uncultured; s__uncultured_Gemmatimonadales_bacterium
OTU652	27	9	30	30	23	5	41	47	44	48	39	48	47	29	48	54	37	55	d__Bacteria; p__Actinobacteria; c__Actinobacteria; o__Solirubrobacterales; f__0319-6M6; g__norank
OTU658	1	1	4	2	2	1	5	2	6	9	5	10	7	11	8	4	8	3	d__Bacteria; p__Proteobacteria; c__Deltaproteobacteria; o__GR-WP33-30; f__norank; g__norank; s__uncultured_Desulfuromonadales_bacterium
OTU664	79	52	57	43	53	15	67	66	82	63	48	65	60	65	70	86	80	33	d__Bacteria; p__Actinobacteria; c__Actinobacteria; o__Solirubrobacterales; f__0319-6M6; g__norank
OTU666	16	11	11	195	54	25	23	29	39	43	25	23	33	37	34	145	108	128	d__Bacteria; p__Actinobacteria; c__Actinobacteria; o__Pseudonocardiales; f__Pseudonocardiaceae; g__Pseudonocardia; s__uncultured_Pseudonocardia_sp.
OTU683	307	206	159	237	206	49	353	333	415	390	291	263	458	337	379	439	344	119	d__Bacteria; p__Actinobacteria; c__Actinobacteria; o__Acidimicrobiales; f__uncultured; g__uncultured
OTU720	3	2	1	101	8	1	5	3	12	8	1	6	8	4	6	8	2	2	d__Bacteria; p__Proteobacteria; c__Gammaproteobacteria; o__Xanthomonadales; f__Xanthomonadales_Incertae_Sedis; g__Acidibacter; s__uncultured_gamma_proteobacterium
OTU726	11	13	11	17	15	4	15	15	18	16	16	13	19	19	14	10	12	6	d__Bacteria; p__Nitrospirae; c__Nitrospira; o__norank; f__norank; g__Nitrospira; s__Nitrospira_sp.
OTU732	5	5	16	7	19	3	17	7	5	36	22	28	20	26	19	20	23	9	d__Bacteria; p__Actinobacteria; c__Actinobacteria; o__norank; f__norank; g__norank; s__uncultured_bacterium__0425-2M17
OTU748	12	6	2	16	15	5	25	28	37	30	17	15	37	19	43	30	9	8	d__Bacteria; p__Actinobacteria; c__Actinobacteria; o__Acidimicrobiales; f__Iamiaceae; g__Iamia
OTU751	4	5	2	9	6	2	5	6	13	22	23	11	12	10	11	18	31	6	d__Bacteria; p__Gemmatimonadetes; c__Gemmatimonadetes; o__AT425-EubC11_terrestrial_group; f__norank; g__norank; s__uncultured_bacterium
OTU769	23	17	30	42	53	5	43	17	39	70	59	71	82	77	62	37	52	18	d__Bacteria; p__Chloroflexi; c__Chloroflexia; o__Chloroflexales; f__Roseiflexaceae; g__Roseiflexus; s__uncultured_Chloroflexi_bacterium
OTU774	11	7	7	7	1	7	6	13	21	14	23	21	20	17	18	17	20	13	d__Bacteria; p__Actinobacteria; c__Actinobacteria; o__Micromonosporales; f__Micromonosporaceae; g__Actinoplanes
OTU777	2	1	1	3	1	1	1	5	7	2	2	4	3	9	4	10	7	2	d__Bacteria; p__Actinobacteria; c__Actinobacteria; o__Gaiellales; f__Gaiellaceae; g__Gaiella
OTU778	20	57	10	79	47	135	127	170	145	126	219	114	192	152	163	272	271	256	d__Bacteria; p__Proteobacteria; c__Alphaproteobacteria; o__Rhizobiales; f__Hyphomicrobiaceae; g__Devosia; s__uncultured_bacterium
OTU783	2	2	1	5	5	4	1	4	3	1	4	5	6	2	2	1	6	5	d__Bacteria; p__Saccharibacteria; c__norank; o__norank; f__norank; g__norank; s__uncultured_bacterium
OTU790	4	3	9	16	9	4	81	65	56	199	85	76	126	111	71	125	64	28	d__Bacteria; p__Actinobacteria; c__Actinobacteria; o__Rubrobacterales; f__Rubrobacteriaceae; g__Rubrobacter
OTU791	7	6	8	15	20	8	9	18	13	31	17	20	13	8	15	17	16	5	d__Bacteria; p__Actinobacteria; c__Actinobacteria; o__Propionibacteriales; f__Nocardioidaceae; g__Nocardioides; s__uncultured_bacterium
OTU798	25	18	21	52	33	39	28	23	27	21	14	33	36	27	22	28	38	22	d__Bacteria; p__Proteobacteria; c__Alphaproteobacteria; o__Sphingomonadales; f__Sphingomonadaceae; g__Sphingomonas
OTU818	21	20	7	30	34	14	38	34	43	24	28	39	48	44	36	26	22	9	d__Bacteria; p__Proteobacteria; c__Alphaproteobacteria; o__Rhodospirillales; f__Rhodospirillales_Incertae_Sedis; g__Candidatus_Alysiosphaera; s__uncultured_bacterium
OTU822	10	13	7	22	20	1	40	28	41	45	37	38	31	22	30	24	37	8	d__Bacteria; p__Nitrospirae; c__Nitrospira; o__norank; f__norank; g__Nitrospira
OTU835	391	463	504	248	405	50	90	51	78	96	131	133	3	94	160	1	36	21	d__Bacteria; p__Firmicutes; c__Bacilli; o__Bacillales; f__Bacillaceae; g__Bacillus; s__Bacillus_circulans
OTU843	2	23	5	615	132	4420	51	189	15	9	7	4	11	19	2	7	3	1	d__Bacteria; p__Cyanobacteria; c__Cyanobacteria; o__SubsectionIII; f__FamilyI; g__Phormidium; s__Microcoleus_sp._PCC_7113
OTU846	3	4	5	7	15	6	6	24	14	16	9	7	72	43	24	40	31	6	d__Bacteria; p__Acidobacteria; c__Acidobacteria; o__Subgroup_10; f__ABS-19; g__norank
OTU855	2	7	4	2	2	2	29	22	21	7	5	14	21	19	9	4	9	8	d__Bacteria; p__Saccharibacteria; c__norank; o__norank; f__norank; g__norank; s__uncultured_Candidatus_Saccharibacteria_bacterium
OTU871	11	26	15	45	43	36	129	113	123	62	98	61	116	106	136	149	136	105	d__Bacteria; p__Acidobacteria; c__Acidobacteria; o__Subgroup_3; f__Unknown_Family; g__Bryobacter
OTU876	11	3	8	11	7	1	12	7	7	10	10	8	11	12	10	15	7	7	d__Bacteria; p__Actinobacteria; c__Actinobacteria; o__Gaiellales; f__uncultured; g__uncultured
OTU882	3	2	7	21	12	35	27	39	40	22	11	10	19	20	24	23	16	26	d__Bacteria; p__Bacteroidetes; c__Sphingobacteriia; o__Sphingobacteriales; f__Chitinophagaceae; g__Segetibacter; s__uncultured_bacterium
OTU890	8	1	1	3	1	2	1	4	10	6	1	3	6	2	5	9	9	4	d__Bacteria; p__Actinobacteria; c__Actinobacteria; o__Acidimicrobiales; f__uncultured; g__uncultured; s__uncultured_soil_bacterium
OTU903	2	5	3	41	7	9	6	21	5	13	11	9	8	6	3	11	10	5	d__Bacteria; p__Proteobacteria; c__Alphaproteobacteria; o__Sphingomonadales; f__MN_122.2a; g__norank; s__uncultured_bacterium
OTU917	6	4	10	7	10	2	52	32	37	117	54	72	48	50	27	32	49	15	d__Bacteria; p__Chloroflexi; c__JG30-KF-CM66; o__norank; f__norank; g__norank; s__uncultured_bacterium
OTU918	15	7	10	6	19	1	2	5	11	6	2	7	5	3	8	7	6	3	d__Bacteria; p__Actinobacteria; c__Actinobacteria; o__Solirubrobacterales; f__Patulibacteraceae; g__Patulibacter; s__uncultured_bacterium
OTU928	1	2	2	11	14	2	37	28	24	37	35	27	49	27	18	41	26	10	d__Bacteria; p__Chloroflexi; c__Thermomicrobia; o__AKYG1722; f__norank; g__norank
OTU941	64	45	36	87	70	86	304	417	506	267	313	316	481	375	414	641	777	724	d__Bacteria; p__Actinobacteria; c__Actinobacteria; o__Micromonosporales; f__Micromonosporaceae
OTU943	4	5	1	4	15	5	63	25	61	49	30	35	34	31	39	5	15	8	d__Bacteria; p__Chloroflexi; c__Ardenticatenia; o__Ardenticatenales; f__norank; g__norank; s__uncultured_bacterium
OTU944	15	12	9	37	30	8	25	17	18	14	20	19	21	22	20	17	15	12	d__Bacteria; p__Chloroflexi; c__Chloroflexia; o__Chloroflexales; f__Roseiflexaceae; g__Roseiflexus; s__uncultured_bacterium
OTU955	4	1	9	23	25	9	43	49	19	45	50	35	39	55	19	40	41	27	d__Bacteria; p__Chloroflexi; c__KD4-96; o__norank; f__norank; g__norank
OTU969	10	6	9	38	15	1	15	18	19	22	17	33	15	14	20	11	13	10	d__Bacteria; p__Proteobacteria; c__Alphaproteobacteria; o__Sphingomonadales; f__Erythrobacteraceae; g__Altererythrobacter
OTU974	4	8	3	10	6	3	4	2	2	8	8	14	7	7	6	4	4	3	d__Bacteria; p__Chloroflexi; c__JG30-KF-CM66; o__norank; f__norank; g__norank; s__uncultured_bacterium
OTU979	1	2	2	4	1	1	2	3	1	3	2	4	2	4	3	3	4	3	d__Bacteria; p__Proteobacteria; c__Alphaproteobacteria; o__Rhodospirillales; f__Rhodospirillales_Incertae_Sedis; g__Candidatus_Alysiosphaera; s__uncultured_alpha_proteobacterium
OTU994	4	5	1	8	1	1	20	18	7	50	34	37	24	17	8	17	38	20	d__Bacteria; p__Actinobacteria; c__Actinobacteria
OTU997	116	66	35	46	57	16	33	21	30	57	62	49	75	27	43	99	38	16	d__Bacteria; p__Actinobacteria; c__Actinobacteria; o__Acidimicrobiales; f__Acidimicrobiaceae; g__uncultured; s__uncultured_organism
OTU998	2	120	2	21	10	137	27	114	136	35	14	17	19	20	11	2	9	2	d__Bacteria; p__Gemmatimonadetes; c__Gemmatimonadetes; o__AT425-EubC11_terrestrial_group; f__norank; g__norank; s__uncultured_bacterium
OTU1001	4	9	2	2	2	1	4	2	2	11	5	11	7	9	4	2	1	1	d__Bacteria; p__Chloroflexi; c__Chloroflexia; o__Herpetosiphonales; f__Herpetosiphonaceae; g__Herpetosiphon; s__uncultured_Chloroflexi_bacterium
OTU1011	2	2	11	3	20	1	21	21	14	32	39	42	15	19	15	13	30	7	d__Bacteria; p__Acidobacteria; c__Acidobacteria; o__Subgroup_7; f__norank; g__norank; s__uncultured_Acidobacteria_bacterium
OTU1015	1	3	6	7	3	1	16	9	17	10	10	9	17	17	13	16	16	2	d__Bacteria; p__Proteobacteria; c__Alphaproteobacteria; o__Rhizobiales
OTU1027	47	26	25	59	69	58	19	44	19	32	26	27	59	38	28	68	13	25	d__Bacteria; p__Actinobacteria; c__Actinobacteria; o__Micrococcales; f__Cellulomonadaceae; g__Cellulomonas
OTU1046	4	16	4	23	31	77	18	26	24	14	20	10	24	21	16	20	33	13	d__Bacteria; p__Chloroflexi; c__Thermomicrobia; o__JG30-KF-CM45; f__norank; g__norank; s__uncultured_bacterium
OTU1049	14	21	15	24	45	4	9	3	8	5	9	5	12	8	10	8	5	3	d__Bacteria; p__Bacteroidetes; c__Cytophagia; o__Cytophagales; f__Cytophagaceae; g__Adhaeribacter
OTU1051	110	69	27	126	102	334	61	121	135	59	92	89	202	92	91	128	73	88	d__Bacteria; p__Actinobacteria; c__Actinobacteria; o__Propionibacteriales; f__Propionibacteriaceae; g__Friedmanniella; s__uncultured_bacterium
OTU1056	189	186	113	467	280	919	485	539	607	265	310	277	548	355	357	585	451	393	d__Bacteria; p__Proteobacteria; c__Alphaproteobacteria; o__Rhizobiales; f__Bradyrhizobiaceae; g__Bosea; s__uncultured_alpha_proteobacterium
OTU1058	7	10	3	18	10	5	43	46	21	28	30	28	26	26	17	19	31	45	d__Bacteria; p__Chloroflexi; c__TK10; o__norank; f__norank; g__norank; s__uncultured_bacterium
OTU1066	20	20	54	53	60	29	34	27	17	18	23	33	32	33	18	28	17	9	d__Bacteria; p__Chloroflexi; c__KD4-96; o__norank; f__norank; g__norank; s__uncultured_Chloroflexi_bacterium
OTU1068	16	9	9	18	15	3	7	6	3	12	5	13	7	8	3	1	4	2	d__Bacteria; p__Chloroflexi; c__Gitt-GS-136; o__norank; f__norank; g__norank; s__uncultured_bacterium
OTU1070	8	5	12	10	8	3	13	9	10	7	10	13	12	11	8	8	8	4	d__Bacteria; p__Chloroflexi; c__Chloroflexia; o__Chloroflexales; f__Roseiflexaceae; g__Roseiflexus
OTU1075	4	4	3	10	5	9	1	11	8	5	7	11	13	13	8	29	21	11	d__Bacteria; p__Actinobacteria; c__Actinobacteria; o__Pseudonocardiales; f__Pseudonocardiaceae; g__Pseudonocardia; s__uncultured_bacterium
OTU1076	10	5	7	20	17	5	14	7	14	25	24	8	15	5	7	7	8	14	d__Bacteria; p__Actinobacteria; c__Actinobacteria; o__Micrococcales; f__Microbacteriaceae; g__Microbacterium
OTU1082	3	2	2	4	3	13	10	16	14	9	8	7	9	13	13	7	10	2	d__Bacteria; p__Chloroflexi; c__Chloroflexia; o__Chloroflexales; f__Roseiflexaceae; g__Roseiflexus
OTU1083	13	15	38	79	73	19	449	514	286	195	73	105	150	156	81	139	133	103	d__Bacteria; p__Acidobacteria; c__Acidobacteria; o__Subgroup_4; f__RB41; g__norank; s__uncultured_bacterium
OTU1087	11	15	10	35	28	19	30	25	21	30	20	26	36	33	28	31	12	12	d__Bacteria; p__Actinobacteria; c__Actinobacteria; o__Micrococcales; f__Microbacteriaceae; g__Agrococcus
OTU1100	15	10	35	22	34	18	44	29	18	42	62	73	44	36	23	36	16	9	d__Bacteria; p__Actinobacteria; c__Actinobacteria; o__norank; f__norank; g__norank
OTU1101	2	12	15	81	48	18	419	258	230	115	233	255	122	121	104	40	32	110	d__Bacteria; p__Acidobacteria; c__Acidobacteria; o__Subgroup_4; f__RB41; g__norank; s__uncultured_Acidobacterium_sp.
OTU1117	6	11	14	41	15	4	42	20	36	62	45	66	27	55	24	24	80	19	d__Bacteria; p__Chloroflexi; c__TK10; o__norank; f__norank; g__norank; s__uncultured_Chloroflexus_sp.
OTU1138	8	6	7	17	17	10	54	58	77	60	68	45	75	77	73	125	212	125	d__Bacteria; p__Actinobacteria; c__Actinobacteria; o__Propionibacteriales; f__Nocardioidaceae; g__Nocardioides
OTU1147	2	5	6	23	2	3	14	17	29	20	23	19	43	21	26	22	21	11	d__Bacteria; p__Proteobacteria; c__Alphaproteobacteria; o__Rhizobiales; f__Xanthobacteraceae; g__Labrys; s__uncultured_bacterium
OTU1154	3	2	3	6	4	3	17	8	22	18	24	12	21	19	20	17	33	14	d__Bacteria; p__Proteobacteria; c__Betaproteobacteria; o__TRA3-20; f__norank; g__norank
OTU1155	9	4	11	8	8	4	51	28	46	56	47	58	44	58	56	44	47	17	d__Bacteria; p__Proteobacteria; c__Alphaproteobacteria; o__Rhodospirillales; f__DA111; g__norank
OTU1158	8	4	4	4	19	15	1	5	4	3	1	4	6	5	3	5	4	1	d__Bacteria; p__Actinobacteria; c__Actinobacteria; o__Propionibacteriales; f__Nocardioidaceae; g__Nocardioides
OTU1169	5	1	4	4	4	2	6	5	6	2	3	1	6	4	2	3	2	5	d__Bacteria; p__Proteobacteria; c__Deltaproteobacteria; o__Myxococcales; f__Haliangiaceae; g__Haliangium; s__uncultured_delta_proteobacterium
OTU1183	1	7	15	19	20	19	39	26	18	26	29	19	29	34	18	37	26	64	d__Bacteria; p__Acidobacteria; c__Acidobacteria; o__Subgroup_4; f__Unknown_Family; g__Blastocatella; s__uncultured_bacterium_gp4
OTU1202	4	1	4	7	3	1	12	18	25	24	22	19	29	23	13	16	32	17	d__Bacteria; p__Chloroflexi; c__S085; o__norank; f__norank; g__norank; s__uncultured_Chloroflexi_bacterium
OTU1209	2	3	1	9	4	1	18	13	23	19	13	19	14	12	18	15	23	21	d__Bacteria; p__Proteobacteria; c__Alphaproteobacteria; o__Rhizobiales
OTU1211	6	8	9	16	7	5	42	22	28	23	37	19	43	45	27	48	44	31	d__Bacteria; p__Proteobacteria; c__Betaproteobacteria; o__TRA3-20; f__norank; g__norank
OTU1214	1	1	6	6	4	1	32	24	20	17	21	9	12	17	13	10	28	13	d__Bacteria; p__Chloroflexi; c__Chloroflexia; o__Kallotenuales; f__AKIW781; g__norank; s__uncultured_bacterium
OTU1215	2	1	3	6	8	10	12	7	9	12	8	3	5	3	9	6	3	6	d__Bacteria; p__Armatimonadetes; c__norank; o__norank; f__norank; g__norank
OTU1217	11	9	19	14	13	2	20	14	13	12	15	31	28	20	15	4	6	4	d__Bacteria; p__Acidobacteria; c__Acidobacteria; o__Subgroup_4; f__RB41; g__norank; s__uncultured_Acidobacterium_sp.
OTU1224	6	3	5	24	13	6	13	4	26	12	14	6	13	11	11	4	3	3	d__Bacteria; p__Proteobacteria; c__Alphaproteobacteria; o__Rhizobiales; f__Rhizobiaceae; g__Ensifer
OTU1234	1	3	1	13	8	4	28	23	30	29	36	30	42	22	34	24	26	18	d__Bacteria; p__Proteobacteria; c__Betaproteobacteria; o__TRA3-20; f__norank; g__norank; s__uncultured_soil_bacterium
OTU1242	24	36	31	46	43	15	162	122	157	174	127	125	209	143	110	189	111	55	d__Bacteria; p__Chloroflexi; c__Thermomicrobia; o__JG30-KF-CM45; f__norank; g__norank; s__uncultured_Chloroflexi_bacterium
OTU1254	15	14	9	46	22	74	11	28	33	13	22	15	25	10	15	18	19	10	d__Bacteria; p__Proteobacteria; c__Alphaproteobacteria; o__Rhodospirillales; f__Acetobacteraceae; g__uncultured; s__uncultured_Paracraurococcus_sp.
OTU1260	1	2	1	10	4	1	8	2	8	11	6	8	13	14	5	10	15	3	d__Bacteria; p__Chloroflexi; c__Chloroflexia; o__Chloroflexales; f__Roseiflexaceae; g__Roseiflexus; s__uncultured_bacterium
OTU1261	9	24	27	74	45	23	193	162	107	281	232	239	243	221	77	263	129	130	d__Bacteria; p__Actinobacteria; c__Actinobacteria; o__Rubrobacterales; f__Rubrobacteriaceae; g__Rubrobacter; s__uncultured_bacterium
OTU1272	54	59	43	93	97	65	180	174	191	106	122	113	186	132	123	140	157	70	d__Bacteria; p__Proteobacteria; c__Alphaproteobacteria; o__Rhizobiales; f__Methylobacteriaceae
OTU1274	8	6	5	13	4	2	54	13	46	50	28	46	27	37	50	38	58	20	d__Bacteria; p__Proteobacteria; c__Alphaproteobacteria; o__Rickettsiales; f__Rickettsiales_Incertae_Sedis; g__Constrictibacter; s__uncultured_bacterium
OTU1294	4	5	3	5	4	2	25	31	33	38	29	30	24	30	20	36	28	8	d__Bacteria; p__Actinobacteria; c__Actinobacteria; o__Solirubrobacterales; f__288-2; g__norank; s__uncultured_bacterium
OTU1300	6	4	4	5	10	9	22	10	14	20	13	11	4	11	12	10	14	7	d__Bacteria; p__Chloroflexi; c__Thermomicrobia; o__JG30-KF-CM45; f__norank; g__norank; s__uncultured_bacterium
OTU1302	3	2	3	5	4	5	10	5	14	5	8	10	6	6	9	1	8	2	d__Bacteria; p__Saccharibacteria; c__norank; o__norank; f__norank; g__norank
OTU1310	8	2	4	4	6	5	8	14	11	12	18	15	12	11	12	7	3	1	d__Bacteria; p__Actinobacteria; c__Actinobacteria; o__Solirubrobacterales
OTU1316	3	3	1	6	1	1	14	10	14	9	5	7	8	15	20	15	13	5	d__Bacteria; p__Gemmatimonadetes; c__Gemmatimonadetes; o__AT425-EubC11_terrestrial_group; f__norank; g__norank; s__uncultured_bacterium
OTU1326	1	5	4	7	8	5	44	25	22	82	55	64	93	89	20	158	69	44	d__Bacteria; p__Actinobacteria; c__Actinobacteria; o__Rubrobacterales; f__Rubrobacteriaceae; g__Rubrobacter; s__uncultured_actinobacterium
OTU1347	11	5	9	11	10	7	11	9	5	12	7	8	9	10	12	13	8	7	d__Bacteria; p__Proteobacteria; c__Betaproteobacteria; o__Burkholderiales; f__Comamonadaceae
OTU1348	3	3	4	11	11	5	14	10	7	20	28	22	27	28	17	41	23	13	d__Bacteria; p__Actinobacteria; c__Actinobacteria; o__norank; f__norank; g__norank; s__uncultured_bacterium
OTU1351	6	1	2	7	5	2	13	13	16	18	24	24	36	40	22	44	50	54	d__Bacteria; p__Actinobacteria; c__Actinobacteria; o__Pseudonocardiales; f__Pseudonocardiaceae; g__Pseudonocardia
OTU1356	9	6	25	37	37	10	27	20	41	44	48	44	27	26	29	8	27	12	d__Bacteria; p__Chloroflexi; c__Chloroflexia; o__Chloroflexales; f__Roseiflexaceae; g__Roseiflexus; s__uncultured_bacterium
OTU1372	3	2	11	14	4	1	6	4	6	8	2	14	10	11	7	3	4	4	d__Bacteria; p__Proteobacteria; c__Gammaproteobacteria; o__Xanthomonadales; f__uncultured; g__uncultured
OTU1385	5971	5413	5326	3204	4036	591	975	445	1234	1104	1436	1631	145	1182	2202	100	412	187	d__Bacteria; p__Firmicutes; c__Bacilli; o__Lactobacillales; f__Streptococcaceae; g__Lactococcus; s__Lactococcus_piscium
OTU1410	1	2	1	2	7	1	7	4	6	1	3	1	9	4	1	4	10	8	d__Bacteria; p__Acidobacteria; c__Acidobacteria; o__Subgroup_6; f__norank; g__norank
OTU1426	7	8	7	8	7	1	38	41	23	31	30	35	35	17	27	17	20	12	d__Bacteria; p__Proteobacteria; c__Alphaproteobacteria; o__Rickettsiales; f__Rickettsiales_Incertae_Sedis; g__Constrictibacter; s__uncultured_bacterium
OTU1442	403	367	415	239	288	47	80	35	79	87	130	125	8	95	149	13	26	13	d__Bacteria; p__Firmicutes; c__Bacilli; o__Bacillales; f__Bacillaceae; g__Oceanobacillus; s__Oceanobacillus_profundus
OTU1460	26	19	30	23	24	5	14	11	6	29	14	21	17	14	10	8	4	1	d__Bacteria; p__Actinobacteria; c__Actinobacteria; o__Micrococcales; f__Microbacteriaceae; g__Agromyces
OTU1463	6	1	4	8	6	3	44	45	57	35	48	21	23	21	20	8	12	3	d__Bacteria; p__Acidobacteria; c__Acidobacteria; o__Subgroup_7; f__norank; g__norank
OTU1480	74	79	31	269	162	830	84	144	157	73	110	80	116	95	96	136	136	77	d__Bacteria; p__Proteobacteria; c__Alphaproteobacteria; o__Rhodobacterales; f__Rhodobacteraceae; g__Rubellimicrobium; s__uncultured_bacterium
OTU1486	2	2	4	10	2	1	52	38	51	33	33	32	21	33	30	30	47	66	d__Bacteria; p__Chloroflexi; c__TK10; o__norank; f__norank; g__norank; s__uncultured_bacterium
OTU1503	1	3	5	6	10	2	5	2	3	6	4	10	17	9	5	12	6	8	d__Bacteria; p__Acidobacteria; c__Acidobacteria; o__Subgroup_6; f__norank; g__norank; s__uncultured_bacterium_gp6
OTU1512	6	6	8	12	12	5	8	3	1	29	9	17	3	7	7	1	2	2	d__Bacteria; p__Chloroflexi; c__Chloroflexia; o__Herpetosiphonales; f__Herpetosiphonaceae; g__Herpetosiphon; s__uncultured_Chloroflexi_bacterium
OTU1513	115	70	37	295	147	524	333	621	506	398	437	388	705	426	422	517	398	190	d__Bacteria; p__Actinobacteria; c__Actinobacteria; o__Frankiales; f__Geodermatophilaceae; g__Geodermatophilus; s__Geodermatophilus_obscurus_DSM_43160
OTU1529	2	1	2	5	5	2	21	24	35	23	23	20	38	17	22	22	40	32	d__Bacteria; p__Proteobacteria; c__Alphaproteobacteria; o__Rhizobiales
OTU1530	4	1	2	4	2	1	15	12	20	22	22	17	14	14	12	13	8	8	d__Bacteria; p__Chloroflexi; c__Thermomicrobia; o__AKYG1722; f__norank; g__norank; s__uncultured_bacterium
OTU1537	4	6	3	16	21	9	32	24	28	11	5	8	17	4	11	11	8	2	d__Bacteria; p__Bacteroidetes; c__Sphingobacteriia; o__Sphingobacteriales; f__Chitinophagaceae; g__Segetibacter
OTU1548	48	79	57	37	37	7	12	7	19	7	13	19	11	20	28	9	6	1	d__Bacteria; p__Firmicutes; c__Bacilli; o__Bacillales; f__Bacillaceae; g__Bacillus
OTU1560	7	3	6	54	37	6	42	49	46	84	44	38	10	10	24	13	12	10	d__Bacteria; p__Actinobacteria; c__Actinobacteria; o__Solirubrobacterales; f__0319-6M6; g__norank; s__uncultured_bacterium
OTU1561	1	2	1	3	3	1	4	2	3	5	3	2	9	11	3	2	6	1	d__Bacteria; p__Gemmatimonadetes; c__Gemmatimonadetes; o__Gemmatimonadales; f__Gemmatimonadaceae; g__uncultured; s__uncultured_Gemmatimonadetes_bacterium
OTU1572	7	7	3	20	12	9	15	11	19	25	22	23	20	27	37	58	74	52	d__Bacteria; p__Proteobacteria; c__Alphaproteobacteria; o__Rhizobiales; f__Phyllobacteriaceae; g__Mesorhizobium
OTU1577	6	2	3	4	5	17	8	21	11	10	11	11	23	12	17	8	10	9	d__Bacteria; p__Actinobacteria; c__Actinobacteria; o__Pseudonocardiales; f__Pseudonocardiaceae; g__Pseudonocardia; s__uncultured_bacterium
OTU1579	1	1	11	5	4	1	12	16	13	16	8	12	8	14	5	20	8	7	d__Bacteria; p__Acidobacteria; c__Acidobacteria; o__Subgroup_6; f__norank; g__norank
OTU1582	2	6	4	11	15	28	16	30	20	14	9	15	27	20	16	23	17	12	d__Bacteria; p__Actinobacteria; c__Actinobacteria; o__Propionibacteriales; f__Propionibacteriaceae; g__Microlunatus; s__uncultured_bacterium
OTU1596	35	36	33	16	31	11	7	15	10	33	12	23	14	24	16	20	8	1	d__Bacteria; p__Actinobacteria; c__Actinobacteria; o__Acidimicrobiales; f__Acidimicrobiales_Incertae_Sedis; g__Aciditerrimonas; s__uncultured_bacterium
OTU1599	37	19	32	34	43	15	45	37	21	69	37	44	49	16	16	23	9	2	d__Bacteria; p__Actinobacteria; c__Actinobacteria; o__Propionibacteriales; f__Nocardioidaceae; g__Aeromicrobium; s__uncultured_bacterium
OTU1602	1	3	1	3	3	3	6	4	7	5	7	7	15	4	4	13	9	4	d__Bacteria; p__Proteobacteria; c__Betaproteobacteria; o__Burkholderiales; f__Burkholderiaceae; g__Lautropia
OTU1612	6	2	8	12	14	4	106	66	72	55	57	40	41	48	35	28	40	15	d__Bacteria; p__Chloroflexi; c__Chloroflexia; o__Chloroflexales; f__Roseiflexaceae; g__Roseiflexus
OTU1617	20	12	30	50	63	19	74	60	42	93	75	78	80	80	39	39	31	24	d__Bacteria; p__Chloroflexi; c__KD4-96; o__norank; f__norank; g__norank; s__uncultured_bacterium
OTU1619	7	3	5	10	7	5	15	13	14	9	8	7	13	11	7	11	8	22	d__Bacteria; p__Chloroflexi; c__Thermomicrobia; o__JG30-KF-CM45; f__norank; g__norank
OTU1621	7	10	8	14	11	6	22	13	24	25	28	25	19	19	20	28	30	15	d__Bacteria; p__Acidobacteria; c__Acidobacteria; o__Subgroup_3; f__Unknown_Family; g__Bryobacter; s__uncultured_soil_bacterium
OTU1623	1	1	1	4	6	1	2	3	9	41	21	25	5	11	19	7	1	1	d__Bacteria; p__Gemmatimonadetes; c__Gemmatimonadetes; o__Gemmatimonadales; f__Gemmatimonadaceae; g__uncultured
OTU1643	4	9	18	139	39	13	29	33	33	51	60	82	41	32	25	14	23	10	d__Bacteria; p__Actinobacteria; c__Actinobacteria; o__Solirubrobacterales; f__480-2; g__norank
OTU1645	4	5	3	30	27	121	32	38	39	21	27	32	31	19	36	30	50	43	d__Bacteria; p__Proteobacteria; c__Alphaproteobacteria; o__Rhodospirillales; f__Rhodospirillales_Incertae_Sedis; g__Geminicoccus; s__uncultured_bacterium
OTU1659	10	2	8	14	9	1	5	2	1	3	4	4	9	4	3	6	4	1	d__Bacteria; p__Actinobacteria; c__Actinobacteria; o__Acidimicrobiales; f__uncultured; g__uncultured; s__uncultured_bacterium
OTU1664	2	1	1	12	1	2	7	8	9	8	8	5	11	9	12	12	12	13	d__Bacteria; p__Bacteroidetes; c__Cytophagia; o__Order_II; f__Rhodothermaceae; g__norank
OTU1667	1	1	1	11	11	40	14	13	16	4	16	5	16	13	11	17	13	18	d__Bacteria; p__Proteobacteria; c__Alphaproteobacteria; o__Sphingomonadales; f__7B-8; g__norank; s__uncultured_bacterium
OTU1672	1	2	1	5	2	2	10	9	4	9	33	24	19	8	7	21	21	8	d__Bacteria; p__Actinobacteria; c__Actinobacteria; o__norank; f__norank; g__norank
OTU1675	7	3	3	3	4	4	22	9	15	10	12	11	7	9	5	21	13	8	d__Bacteria; p__Actinobacteria; c__Actinobacteria; o__Acidimicrobiales; f__uncultured; g__uncultured
OTU1681	35	26	11	22	23	41	10	17	12	3	11	11	20	8	10	24	11	19	d__Bacteria; p__Actinobacteria; c__Actinobacteria; o__Frankiales; f__uncultured; g__uncultured; s__uncultured_bacterium
OTU1698	2	1	5	2	2	1	3	4	7	6	11	10	4	6	10	5	7	3	d__Bacteria; p__Proteobacteria; c__Alphaproteobacteria; o__Rhizobiales; f__Hyphomicrobiaceae
OTU1707	4	1	6	6	6	2	4	6	6	8	5	4	9	6	4	12	17	4	d__Bacteria; p__Actinobacteria; c__Actinobacteria; o__Gaiellales; f__Gaiellaceae; g__Gaiella
OTU1712	2	12	28	12	15	6	197	362	51	38	43	58	30	26	25	9	13	11	d__Bacteria; p__Acidobacteria; c__Acidobacteria; o__Subgroup_4; f__RB41; g__norank
OTU1716	15	6	16	41	30	3	65	58	52	61	57	47	60	48	55	48	67	22	d__Bacteria; p__Actinobacteria; c__Actinobacteria; o__Solirubrobacterales; f__Elev-16S-1332; g__norank; s__uncultured_bacterium
OTU1730	50	34	47	48	57	116	100	147	148	81	96	101	157	96	131	395	277	108	d__Bacteria; p__Actinobacteria; c__Actinobacteria; o__Propionibacteriales; f__Nocardioidaceae; g__Marmoricola; s__uncultured_bacterium
OTU1743	23	27	27	27	50	8	33	33	48	48	27	33	31	51	35	32	37	10	d__Bacteria; p__Actinobacteria; c__Actinobacteria; o__Acidimicrobiales; f__uncultured; g__uncultured
OTU1755	6	6	7	12	7	6	18	11	8	16	13	16	3	17	14	10	6	4	d__Bacteria; p__Gemmatimonadetes; c__Gemmatimonadetes; o__AT425-EubC11_terrestrial_group; f__norank; g__norank
OTU1771	2	2	2	3	5	2	6	5	3	6	3	7	6	8	3	5	3	3	d__Bacteria; p__Chloroflexi; c__KD4-96; o__norank; f__norank; g__norank; s__uncultured_bacterium
OTU1776	1	1	2	6	5	3	32	25	44	9	9	12	13	20	13	7	12	3	d__Bacteria; p__Chloroflexi; c__Caldilineae; o__Caldilineales; f__Caldilineaceae; g__Litorilinea; s__uncultured_bacterium
OTU1805	125	163	110	337	250	293	332	269	408	185	256	254	455	352	379	385	375	157	d__Bacteria; p__Proteobacteria; c__Alphaproteobacteria; o__Rhizobiales; f__Methylobacteriaceae; g__Microvirga; s__uncultured_Balneimonas_sp.
OTU1806	6	8	7	14	12	5	22	16	25	37	18	13	9	10	15	19	23	35	d__Bacteria; p__Actinobacteria; c__Actinobacteria
OTU1823	3	1	5	3	4	2	6	7	4	11	5	11	9	10	4	5	4	2	d__Bacteria; p__Acidobacteria; c__Acidobacteria; o__Subgroup_6; f__norank; g__norank
OTU1828	13	11	2	25	16	9	21	13	31	16	13	10	20	19	21	17	21	7	d__Bacteria; p__Proteobacteria; c__Alphaproteobacteria; o__Rhodospirillales; f__Acetobacteraceae; g__uncultured; s__uncultured_Paracraurococcus_sp.
OTU1830	9	14	15	82	50	88	73	121	84	61	77	53	127	106	56	195	146	294	d__Bacteria; p__Chloroflexi; c__Thermomicrobia; o__JG30-KF-CM45; f__norank; g__norank; s__uncultured_bacterium
OTU1841	5	6	3	22	4	13	18	23	22	8	16	12	26	17	17	15	9	10	d__Bacteria; p__Proteobacteria; c__Alphaproteobacteria; o__Rhodospirillales; f__Acetobacteraceae; g__Craurococcus
OTU1849	11	9	9	38	21	14	57	48	77	39	46	57	69	49	44	36	49	27	d__Bacteria; p__Actinobacteria; c__Actinobacteria; o__Acidimicrobiales; f__Acidimicrobiaceae; g__CL500-29_marine_group
OTU1853	4	6	4	8	6	3	38	41	40	24	23	10	20	24	19	30	22	20	d__Bacteria; p__Actinobacteria; c__Actinobacteria; o__Frankiales; f__Sporichthyaceae; g__Sporichthya; s__Sporichthya_polymorpha
OTU1858	6	6	3	17	11	4	31	31	27	16	23	32	10	35	22	20	15	20	d__Bacteria; p__Chloroflexi; c__TK10; o__norank; f__norank; g__norank; s__uncultured_bacterium
OTU1862	10	8	18	16	24	6	23	19	13	45	33	33	31	25	16	32	13	9	d__Bacteria; p__Chloroflexi; c__KD4-96; o__norank; f__norank; g__norank; s__uncultured_bacterium
OTU1864	7	5	1	20	17	1	75	82	89	71	53	66	59	90	74	43	83	44	d__Bacteria; p__Proteobacteria; c__Alphaproteobacteria; o__Rhodospirillales; f__Rhodospirillaceae
OTU1893	8	1	3	37	8	1	21	13	15	57	39	27	13	18	11	32	26	6	d__Bacteria; p__Actinobacteria; c__Actinobacteria; o__Pseudonocardiales; f__Pseudonocardiaceae; g__Pseudonocardia; s__Pseudonocardia_zijingensis
OTU1904	3	5	2	32	13	5	24	12	18	16	8	13	11	7	13	17	21	3	d__Bacteria; p__Actinobacteria; c__Actinobacteria; o__Euzebyales; f__Euzebyaceae; g__Euzebya; s__uncultured_Actinomycetales_bacterium
OTU1921	11	6	16	17	15	1	12	10	32	18	8	12	5	5	4	6	5	4	d__Bacteria; p__Proteobacteria; c__Gammaproteobacteria; o__Xanthomonadales; f__Xanthomonadales_Incertae_Sedis; g__Steroidobacter
OTU1948	3	2	2	7	5	3	5	3	1	1	6	3	5	7	1	2	3	3	d__Bacteria; p__Proteobacteria; c__Betaproteobacteria; o__Burkholderiales; f__Comamonadaceae; g__Caenimonas; s__uncultured_bacterium
OTU1952	2	1	1	16	10	4	11	19	20	29	11	22	38	25	21	19	25	10	d__Bacteria; p__Proteobacteria; c__Alphaproteobacteria; o__Rhizobiales; f__P-102; g__norank; s__uncultured_bacterium
OTU1967	8	2	5	49	28	16	125	148	130	48	18	30	46	41	61	41	62	78	d__Bacteria; p__Acidobacteria; c__Acidobacteria; o__Subgroup_7; f__norank; g__norank
OTU1969	6	11	4	23	19	7	19	14	20	33	19	27	30	24	19	16	19	7	d__Bacteria; p__Proteobacteria; c__Alphaproteobacteria; o__Rhizobiales; f__Bradyrhizobiaceae; g__Bosea; s__uncultured_alpha_proteobacterium
OTU1976	1	11	11	5	13	4	55	48	17	74	64	47	71	56	44	117	193	67	d__Bacteria; p__Actinobacteria; c__Actinobacteria; o__norank; f__norank; g__norank
OTU1994	23	15	10	188	117	151	47	80	44	60	40	27	74	45	25	73	19	13	d__Bacteria; p__Actinobacteria; c__Actinobacteria; o__Pseudonocardiales; f__Pseudonocardiaceae; g__Actinomycetospora; s__uncultured_bacterium
OTU2009	68	69	42	124	127	146	52	87	79	46	46	59	75	71	61	62	48	103	d__Bacteria; p__Proteobacteria; c__Alphaproteobacteria; o__Rhodobacterales; f__Rhodobacteraceae; g__Rubellimicrobium; s__uncultured_bacterium
OTU2013	1	6	18	637	153	2969	93	510	111	29	32	13	459	98	81	465	111	62	d__Bacteria; p__Cyanobacteria; c__Cyanobacteria; o__SubsectionIII; f__FamilyI; g__Microcoleus; s__Oscillatoria_nigro-viridis_PCC_7112
OTU2023	2	3	1	4	3	5	4	2	7	7	7	2	7	3	2	3	8	7	d__Bacteria; p__Proteobacteria; c__Alphaproteobacteria; o__Rhodospirillales; f__Acetobacteraceae
OTU2024	2	4	4	16	9	5	20	17	19	6	17	10	23	16	31	45	43	47	d__Bacteria; p__Proteobacteria; c__Alphaproteobacteria; o__Sphingomonadales; f__Ellin6055; g__norank; s__uncultured_bacterium
OTU2035	5	9	13	2	10	6	7	6	4	11	12	16	9	1	9	4	5	1	d__Bacteria; p__Proteobacteria; c__Betaproteobacteria; o__Burkholderiales; f__Oxalobacteraceae; g__Massilia
OTU2055	4	4	4	11	4	1	47	46	52	46	39	53	47	38	49	32	44	26	d__Bacteria; p__Actinobacteria; c__Actinobacteria; o__Solirubrobacterales; f__norank; g__norank; s__uncultured_bacterium
OTU2056	1	1	5	7	6	1	218	58	75	4	22	17	13	19	5	26	47	142	d__Bacteria; p__Acidobacteria; c__Acidobacteria; o__Subgroup_4; f__Unknown_Family; g__Blastocatella
OTU2057	4	1	4	14	6	2	18	18	25	20	12	20	10	17	17	10	8	8	d__Bacteria; p__Actinobacteria; c__Actinobacteria; o__Solirubrobacterales; f__480-2; g__norank
OTU2068	2	3	6	13	6	3	8	4	1	7	2	5	6	2	1	2	5	3	d__Bacteria; p__Chloroflexi; c__KD4-96; o__norank; f__norank; g__norank; s__uncultured_Chloroflexi_bacterium
OTU2071	6	2	7	14	4	2	21	14	19	23	32	16	19	20	9	17	20	9	d__Bacteria; p__Chloroflexi; c__S085; o__norank; f__norank; g__norank
OTU2097	1	2	5	5	2	2	1	2	3	9	7	6	5	4	4	3	6	3	d__Bacteria; p__Chloroflexi; c__Caldilineae; o__Caldilineales; f__Caldilineaceae; g__uncultured; s__uncultured_bacterium
OTU2111	4	1	1	2	2	1	17	13	12	12	8	9	15	18	12	19	23	9	d__Bacteria; p__Chloroflexi; c__TK10; o__norank; f__norank; g__norank; s__uncultured_bacterium
OTU2114	6	11	2	8	7	5	14	10	15	13	8	7	16	8	11	4	9	3	d__Bacteria; p__Proteobacteria; c__Deltaproteobacteria; o__Bdellovibrionales; f__Bdellovibrionaceae; g__Bdellovibrio; s__uncultured_bacterium
OTU2115	2	13	4	19	12	25	23	22	16	4	16	10	12	12	3	16	7	9	d__Bacteria; p__Chloroflexi; c__Thermomicrobia; o__AKYG1722; f__norank; g__norank
OTU2125	3	5	6	28	25	20	17	13	20	16	22	21	33	26	31	82	50	131	d__Bacteria; p__Proteobacteria; c__Betaproteobacteria; o__Burkholderiales; f__Burkholderiaceae; g__Lautropia
OTU2133	2	3	1	1	2	2	13	11	6	8	12	11	9	9	5	23	19	26	d__Bacteria; p__Chloroflexi; c__KD4-96; o__norank; f__norank; g__norank
OTU2151	8	1	1	13	2	6	22	36	38	18	16	16	23	19	33	73	35	33	d__Bacteria; p__Actinobacteria; c__Actinobacteria; o__Solirubrobacterales; f__Solirubrobacteraceae; g__Solirubrobacter; s__uncultured_bacterium
OTU2162	5	8	9	30	15	11	15	9	7	22	11	8	14	9	8	1	6	2	d__Bacteria; p__Chloroflexi; c__Chloroflexia; o__Kallotenuales; f__AKIW781; g__norank; s__uncultured_bacterium
OTU2165	60	68	61	250	139	109	1283	1010	1327	1261	1052	1405	1106	989	1019	957	1203	791	d__Bacteria; p__Proteobacteria; c__Alphaproteobacteria; o__Rhizobiales; f__JG34-KF-361; g__norank; s__uncultured_bacterium
OTU2174	9	5	3	23	8	3	66	63	96	70	67	70	134	106	99	113	132	76	d__Bacteria; p__Proteobacteria; c__Alphaproteobacteria; o__Rhizobiales; f__Bradyrhizobiaceae; g__Bosea; s__uncultured_bacterium
OTU2184	3	2	1	6	5	6	16	17	16	7	5	1	6	12	3	15	19	26	d__Bacteria; p__Chloroflexi; c__Chloroflexia; o__Kallotenuales; f__AKIW781; g__norank
OTU2193	1	3	3	14	6	1	9	4	4	10	8	10	9	11	8	17	9	4	d__Bacteria; p__Gemmatimonadetes; c__Gemmatimonadetes; o__AT425-EubC11_terrestrial_group; f__norank; g__norank; s__uncultured_bacterium
OTU2203	10	4	7	18	7	6	86	77	70	89	67	68	60	58	39	46	32	26	d__Bacteria; p__Chloroflexi; c__Thermomicrobia; o__JG30-KF-CM45; f__norank; g__norank; s__uncultured_Chloroflexi_bacterium
OTU2204	16	7	8	31	30	4	20	13	22	38	31	14	20	19	20	16	12	3	d__Bacteria; p__Proteobacteria; c__Gammaproteobacteria; o__Salinisphaerales; f__Salinisphaeraceae; g__uncultured; s__uncultured_gamma_proteobacterium
OTU2209	27	24	18	19	24	6	19	28	30	63	20	23	17	11	17	16	14	4	d__Bacteria; p__Actinobacteria; c__Actinobacteria; o__Acidimicrobiales; f__uncultured; g__uncultured
OTU2211	5	2	4	34	43	3	45	31	32	19	95	77	6	4	3	79	40	10	d__Bacteria; p__Gemmatimonadetes; c__Gemmatimonadetes; o__AT425-EubC11_terrestrial_group; f__norank; g__norank; s__uncultured_bacterium
OTU2216	3	2	5	19	8	3	16	38	24	8	16	17	26	14	18	28	26	10	d__Bacteria; p__Proteobacteria; c__Alphaproteobacteria; o__Rhodospirillales; f__Acetobacteraceae
OTU2220	5	12	3	4	4	2	9	8	6	7	3	5	4	4	5	3	3	2	d__Bacteria; p__Chloroflexi; c__Ardenticatenia; o__Ardenticatenales; f__norank; g__norank
OTU2223	17	11	11	18	13	9	11	12	18	17	7	11	19	7	10	6	7	2	d__Bacteria; p__Actinobacteria; c__Actinobacteria; o__Solirubrobacterales; f__480-2; g__norank; s__uncultured_actinobacterium
OTU2224	3	1	3	11	4	7	48	50	39	214	94	104	250	286	474	79	72	40	d__Bacteria; p__Actinobacteria; c__Actinobacteria; o__Solirubrobacterales
OTU2234	14	5	6	23	11	15	36	38	34	27	21	27	31	20	25	34	37	39	d__Bacteria; p__Proteobacteria; c__Alphaproteobacteria; o__Rhizobiales; f__JG34-KF-361; g__norank; s__uncultured_proteobacterium
OTU2244	6	4	2	6	2	2	10	2	10	9	12	13	14	10	6	14	9	22	d__Bacteria; p__Bacteroidetes; c__Sphingobacteriia; o__Sphingobacteriales; f__Chitinophagaceae; g__uncultured; s__uncultured_Niastella_sp.
OTU2249	1	2	5	2	1	1	17	3	2	16	10	12	12	15	7	13	7	10	d__Bacteria; p__Acidobacteria; c__Acidobacteria; o__Subgroup_6; f__norank; g__norank
OTU2250	3	5	2	7	12	3	8	4	4	15	9	11	11	3	2	7	11	5	d__Bacteria; p__Chloroflexi; c__KD4-96; o__norank; f__norank; g__norank; s__uncultured_Chloroflexi_bacterium
OTU2257	6	4	7	7	9	1	12	10	7	9	16	12	7	11	8	2	6	1	d__Bacteria; p__Chloroflexi; c__TK10; o__norank; f__norank; g__norank
OTU2261	6	4	8	1	4	1	7	5	6	4	9	7	11	8	5	7	2	1	d__Bacteria; p__Actinobacteria; c__Actinobacteria; o__Solirubrobacterales; f__480-2; g__norank; s__uncultured_Rubrobacteridae_bacterium
OTU2275	1	2	2	88	51	9	9	5	12	9	11	2	12	5	9	1	3	1	d__Bacteria; p__Chloroflexi; c__Thermomicrobia; o__JG30-KF-CM45; f__norank; g__norank; s__uncultured_bacterium
OTU2284	1	6	1	2	1	1	14	6	8	8	3	5	4	11	6	7	11	3	d__Bacteria; p__Acidobacteria; c__Acidobacteria; o__Subgroup_3; f__Unknown_Family; g__Bryobacter; s__uncultured_soil_bacterium
OTU2295	7	4	1	9	2	2	1	14	13	2	3	14	7	7	4	13	3	6	d__Bacteria; p__Proteobacteria; c__Alphaproteobacteria; o__Sphingomonadales; f__7B-8; g__norank
OTU2299	10	6	3	20	13	18	53	51	69	37	42	46	52	33	40	52	83	155	d__Bacteria; p__Proteobacteria; c__Alphaproteobacteria; o__Rhizobiales; f__JG34-KF-361; g__norank
OTU2300	14	21	24	34	28	3	57	47	44	69	58	81	50	50	67	46	59	20	d__Bacteria; p__Gemmatimonadetes; c__Gemmatimonadetes; o__Gemmatimonadales; f__Gemmatimonadaceae; g__uncultured; s__uncultured_Gemmatimonadales_bacterium
OTU2307	22	12	25	31	19	12	53	83	94	152	111	110	129	98	109	107	120	62	d__Bacteria; p__Actinobacteria; c__Actinobacteria; o__Micromonosporales; f__Micromonosporaceae
OTU2312	186	106	59	218	175	451	75	179	111	99	106	75	220	84	69	252	110	70	d__Bacteria; p__Actinobacteria; c__Actinobacteria; o__Frankiales; f__uncultured; g__uncultured; s__uncultured_bacterium
OTU2314	1	1	4	5	5	1	3	3	6	12	18	20	6	12	12	11	26	14	d__Bacteria; p__Actinobacteria; c__Actinobacteria; o__Pseudonocardiales; f__Pseudonocardiaceae; g__Kibdelosporangium; s__uncultured_bacterium
OTU2323	4	4	6	7	5	1	7	3	5	2	2	4	1	3	2	5	8	3	d__Bacteria; p__Proteobacteria; c__Betaproteobacteria; o__Nitrosomonadales; f__Nitrosomonadaceae; g__uncultured; s__uncultured_delta_proteobacterium
OTU2328	6	3	5	5	2	1	3	1	3	2	1	3	4	4	1	2	1	2	d__Bacteria; p__Actinobacteria; c__Actinobacteria; o__Solirubrobacterales; f__Patulibacteraceae; g__Patulibacter; s__uncultured_bacterium
OTU2331	1	1	10	4	3	3	7	17	9	41	7	24	12	15	7	9	6	12	d__Bacteria; p__Acidobacteria; c__Acidobacteria; o__Subgroup_6; f__norank; g__norank
OTU2333	14	27	35	85	66	51	171	153	213	217	171	165	213	149	161	209	207	97	d__Bacteria; p__Actinobacteria; c__Actinobacteria; o__Rubrobacterales; f__Rubrobacteriaceae; g__Rubrobacter; s__uncultured_Rubrobacter_sp.
OTU2334	55	28	26	68	37	20	34	41	31	47	50	44	30	23	25	20	17	10	d__Bacteria; p__Actinobacteria; c__Actinobacteria; o__Solirubrobacterales; f__Solirubrobacteraceae; g__Solirubrobacter; s__uncultured_bacterium
OTU2336	3	10	3	8	3	8	3	1	4	1	2	2	3	8	2	12	10	2	d__Bacteria; p__Bacteroidetes; c__Cytophagia; o__Cytophagales; f__Cytophagaceae; g__Hymenobacter
OTU2338	5	5	1	12	18	22	36	46	27	24	25	21	32	34	29	32	41	45	d__Bacteria; p__Proteobacteria; c__Alphaproteobacteria; o__Caulobacterales; f__Caulobacteraceae; g__uncultured
OTU2341	33	16	12	17	26	4	48	59	51	59	41	46	41	36	25	55	40	10	d__Bacteria; p__Actinobacteria; c__Actinobacteria; o__Solirubrobacterales; f__Solirubrobacteraceae; g__Solirubrobacter; s__uncultured_bacterium
OTU2343	319	324	758	614	889	442	325	266	175	446	247	313	742	536	277	155	83	38	d__Bacteria; p__Actinobacteria; c__Actinobacteria; o__Micrococcales; f__Micrococcaceae; g__Arthrobacter; s__Arthrobacter_globiformis
OTU2344	24	32	98	127	120	43	368	449	211	229	246	262	229	211	98	211	134	319	d__Bacteria; p__Acidobacteria; c__Acidobacteria; o__Subgroup_4; f__RB41; g__norank; s__uncultured_bacterium
OTU2351	24	24	44	80	82	44	44	62	93	57	67	73	31	42	122	40	93	92	d__Bacteria; p__Proteobacteria; c__Deltaproteobacteria; o__Myxococcales; f__Cystobacteraceae
OTU2365	3	2	2	4	3	1	18	10	11	19	10	10	11	16	19	11	16	4	d__Bacteria; p__Gemmatimonadetes; c__Gemmatimonadetes; o__AT425-EubC11_terrestrial_group; f__norank; g__norank
OTU2372	1	5	8	6	9	2	29	35	11	9	12	17	7	38	10	9	22	13	d__Bacteria; p__Acidobacteria; c__Acidobacteria; o__Subgroup_4; f__RB41; g__norank; s__uncultured_bacterium
OTU2380	2	3	3	7	3	5	11	11	15	7	1	11	6	6	6	3	10	1	d__Bacteria; p__Actinobacteria; c__Actinobacteria; o__Acidimicrobiales; f__Acidimicrobiaceae; g__CL500-29_marine_group; s__'Hevea_brasiliensis'_phytoplasma
OTU2383	2	3	4	13	13	1	35	24	17	24	18	37	36	17	15	1	2	5	d__Bacteria; p__Acidobacteria; c__Acidobacteria; o__Subgroup_4; f__Unknown_Family; g__Blastocatella
OTU2386	3	1	3	25	12	9	65	60	76	41	52	35	61	73	62	61	81	102	d__Bacteria; p__Proteobacteria; c__Alphaproteobacteria; o__Rhizobiales; f__Bradyrhizobiaceae; g__Bosea; s__uncultured_bacterium
OTU2391	3	6	21	20	22	4	43	35	20	34	50	49	26	36	14	40	24	51	d__Bacteria; p__Chloroflexi; c__KD4-96; o__norank; f__norank; g__norank; s__uncultured_bacterium
OTU2393	15	14	8	43	37	38	28	40	24	28	33	26	41	12	28	54	18	6	d__Bacteria; p__Actinobacteria; c__Actinobacteria; o__Frankiales; f__Geodermatophilaceae; g__Geodermatophilus; s__uncultured_bacterium
OTU2396	8	7	8	13	26	9	16	4	12	30	22	27	14	20	14	19	22	6	d__Bacteria; p__Actinobacteria; c__Actinobacteria; o__Gaiellales; f__uncultured; g__uncultured
OTU2425	20	18	12	26	21	12	24	27	40	34	18	26	41	15	21	33	29	10	d__Bacteria; p__Actinobacteria; c__Actinobacteria; o__Frankiales; f__Sporichthyaceae; g__uncultured; s__uncultured_bacterium
OTU2427	8	1	4	6	4	1	14	17	7	15	13	8	3	14	6	14	12	3	d__Bacteria; p__Actinobacteria; c__Actinobacteria; o__Gaiellales
OTU2428	13	18	9	22	18	17	28	30	28	46	35	34	42	30	38	36	36	32	d__Bacteria; p__Proteobacteria; c__Betaproteobacteria; o__Burkholderiales; f__Comamonadaceae; g__Ramlibacter
OTU2429	12	9	9	31	37	35	180	166	133	209	98	92	80	82	40	41	62	286	d__Bacteria; p__Acidobacteria; c__Acidobacteria; o__Subgroup_4; f__Unknown_Family; g__Blastocatella
OTU2430	63	41	50	52	63	11	28	18	26	55	31	23	37	35	45	57	74	32	d__Bacteria; p__Actinobacteria; c__Actinobacteria; o__Acidimicrobiales; f__uncultured; g__uncultured
OTU2433	2	7	6	9	16	2	30	14	21	12	4	12	14	10	11	10	22	11	d__Bacteria; p__Proteobacteria; c__Betaproteobacteria; o__TRA3-20; f__norank; g__norank; s__uncultured_soil_bacterium
OTU2438	120	88	38	187	130	281	90	171	170	87	121	126	288	120	128	241	129	71	d__Bacteria; p__Actinobacteria; c__Actinobacteria; o__Frankiales; f__Geodermatophilaceae; g__Modestobacter; s__Modestobacter_marinus
OTU2445	3	1	7	5	7	1	11	8	12	16	16	22	3	8	16	4	7	4	d__Bacteria; p__Proteobacteria; c__Betaproteobacteria; o__Burkholderiales; f__Oxalobacteraceae; g__Paucimonas; s__uncultured_bacterium
OTU2460	13	6	10	105	65	19	51	49	61	115	71	93	49	46	51	45	51	46	d__Bacteria; p__Actinobacteria; c__Actinobacteria; o__Micromonosporales; f__Micromonosporaceae; g__Krasilnikovia; s__uncultured_bacterium
OTU2464	5	1	3	6	5	2	9	5	3	5	5	8	8	10	9	6	4	11	d__Bacteria; p__Proteobacteria; c__Deltaproteobacteria; o__Myxococcales; f__uncultured; g__uncultured; s__uncultured_bacterium
OTU2470	73	40	56	19	20	8	35	22	30	41	28	29	24	16	25	11	10	3	d__Bacteria; p__Actinobacteria; c__Actinobacteria; o__Streptomycetales; f__Streptomycetaceae; g__Streptomyces; s__Streptomyces_scabiei
OTU2479	6	2	2	67	27	4	17	31	9	20	14	8	12	18	5	18	2	10	d__Bacteria; p__Actinobacteria; c__Actinobacteria; o__Acidimicrobiales; f__Iamiaceae; g__Iamia; s__uncultured_bacterium
OTU2520	24	16	13	13	26	1	10	22	24	26	21	22	29	24	16	23	12	6	d__Bacteria; p__Actinobacteria; c__Actinobacteria; o__Solirubrobacterales; f__Patulibacteraceae; g__Patulibacter; s__uncultured_bacterium
OTU2521	14	9	26	50	35	14	366	300	348	402	339	346	481	337	224	354	283	173	d__Bacteria; p__Chloroflexi; c__Thermomicrobia; o__JG30-KF-CM45; f__norank; g__norank
OTU2531	3	8	15	65	40	42	128	108	62	118	76	35	211	94	50	102	47	162	d__Bacteria; p__Planctomycetes; c__Planctomycetacia; o__Planctomycetales; f__Planctomycetaceae; g__uncultured; s__uncultured_Singulisphaera_sp.
OTU2538	10	6	7	21	8	7	27	22	21	17	19	22	27	13	15	16	20	13	d__Bacteria; p__Actinobacteria; c__Actinobacteria; o__Acidimicrobiales; f__Acidimicrobiaceae; g__uncultured; s__uncultured_bacterium
OTU2539	30	37	25	104	81	102	118	124	127	82	105	97	109	164	183	53	124	103	d__Bacteria; p__Proteobacteria; c__Alphaproteobacteria; o__Rhodospirillales; f__Rhodospirillaceae; g__Skermanella
OTU2543	25	25	19	89	81	78	47	59	40	56	45	38	75	61	60	41	32	16	d__Bacteria; p__Actinobacteria; c__Actinobacteria; o__Micrococcales; f__Microbacteriaceae
OTU2557	1	3	9	24	21	4	52	57	36	75	60	60	57	48	32	61	32	18	d__Bacteria; p__Actinobacteria; c__Actinobacteria; o__Rubrobacterales; f__Rubrobacteriaceae; g__Rubrobacter
OTU2568	3	2	2	2	8	1	5	1	4	7	3	5	2	4	3	6	2	1	d__Bacteria; p__Nitrospirae; c__Nitrospira; o__norank; f__norank; g__Nitrospira; s__Nitrospira_sp._enrichment_culture_clone_80
OTU2573	5	16	6	32	32	10	6	9	21	6	4	5	3	3	3	1	6	2	d__Bacteria; p__Proteobacteria; c__Betaproteobacteria; o__Nitrosomonadales; f__Nitrosomonadaceae; g__Nitrosomonas; s__uncultured_soil_bacterium
OTU2578	17	15	16	35	19	13	59	46	49	53	30	25	28	38	18	31	18	33	d__Bacteria; p__Chloroflexi; c__Chloroflexia; o__Kallotenuales; f__AKIW781; g__norank; s__uncultured_bacterium
OTU2583	17	13	16	28	24	19	47	45	33	76	76	66	67	64	69	72	95	27	d__Bacteria; p__Proteobacteria; c__Alphaproteobacteria; o__Sphingomonadales; f__AKYG937; g__norank; s__uncultured_bacterium
OTU2586	3	8	6	12	1	2	14	9	19	21	23	23	11	15	21	19	9	5	d__Bacteria; p__Proteobacteria; c__Alphaproteobacteria; o__Rhodospirillales
OTU2590	4	3	1	5	4	1	21	19	13	19	12	5	16	24	16	8	9	28	d__Bacteria; p__Armatimonadetes; c__norank; o__norank; f__norank; g__norank
OTU2618	3	5	2	6	4	1	10	9	10	7	7	5	6	1	6	8	18	1	d__Bacteria; p__Actinobacteria; c__Actinobacteria; o__Gaiellales; f__uncultured; g__uncultured; s__uncultured_bacterium
OTU2620	19	11	20	10	15	3	5	5	4	8	14	5	14	15	17	8	7	6	d__Bacteria; p__Proteobacteria; c__Gammaproteobacteria; o__Xanthomonadales; f__Xanthomonadales_Incertae_Sedis; g__Steroidobacter; s__uncultured_soil_bacterium
OTU2623	3	4	4	5	8	1	5	4	4	4	3	4	10	5	8	1	2	2	d__Bacteria; p__Proteobacteria; c__Deltaproteobacteria; o__GR-WP33-30; f__norank; g__norank
OTU2626	1	1	1	15	5	19	58	61	61	41	35	32	55	28	37	132	77	83	d__Bacteria; p__Actinobacteria; c__Actinobacteria; o__Propionibacteriales; f__Nocardioidaceae; g__Marmoricola
OTU2627	17	25	11	90	62	52	86	77	109	55	63	45	97	54	82	120	94	110	d__Bacteria; p__Proteobacteria; c__Alphaproteobacteria; o__Sphingomonadales; f__Sphingomonadaceae; g__Sphingomonas
OTU2628	4	5	1	12	2	7	40	21	35	22	33	21	28	41	27	47	58	38	d__Bacteria; p__Proteobacteria; c__Alphaproteobacteria; o__Rhizobiales
OTU2637	8	3	2	11	7	3	8	12	7	3	4	7	8	9	5	5	1	2	d__Bacteria; p__Proteobacteria; c__Alphaproteobacteria; o__Rhodospirillales; f__Rhodospirillales_Incertae_Sedis; g__Candidatus_Alysiosphaera
OTU2638	2	8	5	10	11	12	5	4	9	3	5	8	8	6	12	9	16	4	d__Bacteria; p__Bacteroidetes; c__Cytophagia; o__Cytophagales; f__Cytophagaceae; g__Rhodocytophaga
OTU2656	3	6	4	1	1	1	5	2	2	4	8	4	7	11	7	10	13	20	d__Bacteria; p__Chloroflexi; c__Thermomicrobia; o__AKYG1722; f__norank; g__norank; s__uncultured_bacterium
OTU2657	2	1	4	17	2	2	19	14	27	22	17	23	33	33	26	31	26	8	d__Bacteria; p__Proteobacteria; c__Alphaproteobacteria; o__Rhizobiales; f__JG34-KF-361; g__norank; s__uncultured_proteobacterium
OTU2662	3	5	3	5	4	3	20	15	20	18	21	15	28	21	19	23	40	16	d__Bacteria; p__Proteobacteria; c__Betaproteobacteria; o__TRA3-20; f__norank; g__norank; s__uncultured_Nitrosomonadales_bacterium
OTU2668	8	6	4	2	5	3	34	18	25	26	19	14	33	28	20	29	57	36	d__Bacteria; p__Actinobacteria; c__Actinobacteria; o__Acidimicrobiales; f__uncultured; g__uncultured
OTU2670	23	24	10	71	48	139	23	42	39	8	33	14	20	21	16	25	18	17	d__Bacteria; p__Proteobacteria; c__Alphaproteobacteria; o__Rhodobacterales; f__Rhodobacteraceae; g__Rubellimicrobium
OTU2675	9	8	10	26	23	6	19	11	14	26	10	7	9	6	4	2	7	1	d__Bacteria; p__Actinobacteria; c__Actinobacteria; o__Corynebacteriales; f__Mycobacteriaceae; g__Mycobacterium
OTU2693	7	8	8	7	10	1	20	12	5	43	72	51	50	34	18	57	89	19	d__Bacteria; p__Actinobacteria; c__Actinobacteria; o__norank; f__norank; g__norank; s__uncultured_bacterium
OTU2711	3	1	1	6	3	2	2	2	3	1	6	1	9	8	9	11	10	6	d__Bacteria; p__Gemmatimonadetes; c__Gemmatimonadetes; o__Gemmatimonadales; f__Gemmatimonadaceae
OTU2739	26	20	13	12	13	6	8	9	5	2	5	4	11	14	9	7	3	3	d__Bacteria; p__Actinobacteria; c__Actinobacteria; o__Gaiellales; f__Gaiellaceae; g__Gaiella
OTU2741	2	1	4	13	7	3	31	28	23	24	22	16	21	22	11	15	29	16	d__Bacteria; p__Chloroflexi; c__Chloroflexia; o__Kallotenuales; f__AKIW781; g__norank; s__uncultured_bacterium
OTU2754	163	115	80	125	177	24	361	359	379	275	206	177	198	135	167	211	162	79	d__Bacteria; p__Actinobacteria; c__Actinobacteria; o__Solirubrobacterales; f__Patulibacteraceae; g__Patulibacter; s__uncultured_bacterium
OTU2757	4	6	1	3	6	5	9	13	15	11	13	16	16	8	6	12	12	7	d__Bacteria; p__Proteobacteria; c__Alphaproteobacteria; o__Rhodospirillales; f__Acetobacteraceae
OTU2765	9	8	34	1	8	3	5	6	3	6	3	7	3	6	2	1	1	1	d__Bacteria; p__Actinobacteria; c__Actinobacteria; o__norank; f__norank; g__norank; s__uncultured_bacterium__0425-2M17
OTU2774	3	4	6	3	7	1	6	6	2	30	8	14	17	12	13	21	10	1	d__Bacteria; p__Chloroflexi; c__Thermomicrobia; o__JG30-KF-CM45; f__norank; g__norank; s__uncultured_bacterium
OTU2800	15	26	17	7	4	4	8	8	9	5	3	3	3	1	2	2	2	13	d__Bacteria; p__Saccharibacteria; c__norank; o__norank; f__norank; g__norank; s__uncultured_Candidatus_Saccharibacteria_bacterium
OTU2803	2	4	5	2	3	2	3	5	3	36	14	14	3	2	3	3	3	1	d__Bacteria; p__Chloroflexi; c__Thermomicrobia; o__JG30-KF-CM45; f__norank; g__norank; s__uncultured_Thermomicrobia_bacterium
OTU2806	4	5	7	20	6	2	48	56	40	71	55	72	51	43	44	109	79	31	d__Bacteria; p__Actinobacteria; c__Actinobacteria; o__Solirubrobacterales; f__288-2; g__norank; s__uncultured_bacterium
OTU2807	1	3	1	13	13	19	27	28	39	12	10	6	16	15	17	16	18	13	d__Bacteria; p__Proteobacteria; c__Alphaproteobacteria; o__Rhizobiales; f__Methylobacteriaceae
OTU2810	3	2	6	5	3	2	14	20	22	13	15	14	10	16	12	12	17	4	d__Bacteria; p__Bacteroidetes; c__Sphingobacteriia; o__Sphingobacteriales; f__Chitinophagaceae; g__Flavitalea; s__uncultured_bacterium
OTU2825	5	8	4	26	11	26	65	74	87	37	36	42	52	47	35	78	59	160	d__Bacteria; p__Proteobacteria; c__Alphaproteobacteria; o__Rhizobiales
OTU2832	5	5	5	19	5	7	23	24	24	19	27	15	19	25	12	11	18	14	d__Bacteria; p__Acidobacteria; c__Acidobacteria; o__Subgroup_3; f__Unknown_Family; g__Bryobacter; s__uncultured_bacterium
OTU2848	5	2	8	10	8	2	20	15	8	20	9	28	19	32	12	15	20	4	d__Bacteria; p__Acidobacteria; c__Acidobacteria; o__Subgroup_6; f__norank; g__norank
OTU2850	1459	1756	1508	686	1121	108	220	115	236	293	454	489	1	324	525	2	83	50	d__Bacteria; p__Proteobacteria; c__Gammaproteobacteria; o__Enterobacteriales; f__Enterobacteriaceae
OTU2851	3	5	2	6	8	5	38	27	32	20	14	16	46	30	25	14	18	10	d__Bacteria; p__Bacteroidetes; c__Sphingobacteriia; o__Sphingobacteriales; f__Chitinophagaceae; g__Segetibacter
OTU2870	1	4	2	2	1	1	5	3	4	4	3	1	3	10	7	6	9	5	d__Bacteria; p__Proteobacteria; c__Alphaproteobacteria; o__Caulobacterales; f__Caulobacteraceae; g__uncultured; s__uncultured_Rhizobiales_bacterium
OTU2886	12	7	4	14	14	7	14	20	18	45	39	29	25	20	28	18	23	13	d__Bacteria; p__Actinobacteria; c__Actinobacteria; o__Rubrobacterales; f__Rubrobacteriaceae; g__Rubrobacter
OTU2909	9	5	7	24	9	27	29	45	28	27	46	45	26	29	31	60	32	19	d__Bacteria; p__Actinobacteria; c__Actinobacteria; o__Solirubrobacterales; f__Solirubrobacteraceae; g__Solirubrobacter
OTU2929	1	4	2	15	11	4	21	16	12	39	25	41	19	21	22	12	18	2	d__Bacteria; p__Deinococcus-Thermus; c__Deinococci; o__Deinococcales; f__Trueperaceae; g__Truepera; s__uncultured_bacterium
OTU2932	2	8	1	23	9	12	20	34	29	17	29	18	28	26	22	35	61	28	d__Bacteria; p__Proteobacteria; c__Alphaproteobacteria; o__Rhizobiales
OTU2936	11	7	1	52	44	787	6	120	32	16	16	12	12	11	9	4	3	30	d__Bacteria; p__Gemmatimonadetes; c__Gemmatimonadetes; o__AT425-EubC11_terrestrial_group; f__norank; g__norank; s__uncultured_bacterium
OTU2943	6	3	12	13	6	2	17	6	7	22	15	19	11	19	6	14	7	4	d__Bacteria; p__Acidobacteria; c__Acidobacteria; o__Subgroup_6; f__norank; g__norank; s__uncultured_bacterium
OTU2954	9	12	14	20	13	3	33	16	36	33	35	31	34	24	29	18	16	13	d__Bacteria; p__Proteobacteria; c__Alphaproteobacteria; o__Rhizobiales; f__Xanthobacteraceae; g__Pseudolabrys; s__uncultured_bacterium
OTU2958	4	1	2	7	2	1	2	8	4	3	4	3	8	5	5	1	3	4	d__Bacteria; p__Chloroflexi; c__KD4-96; o__norank; f__norank; g__norank; s__uncultured_bacterium
OTU2963	4	2	6	3	3	2	14	18	22	30	22	28	15	11	19	8	7	2	d__Bacteria; p__Actinobacteria; c__Actinobacteria; o__Solirubrobacterales; f__0319-6M6; g__norank; s__uncultured_actinobacterium
OTU2964	5	36	10	41	45	129	23	22	42	15	10	16	20	22	14	24	23	6	d__Bacteria; p__Proteobacteria; c__Alphaproteobacteria; o__Rhodobacterales; f__Rhodobacteraceae; g__Rubellimicrobium; s__uncultured_bacterium
OTU2974	1	5	6	27	16	1	74	48	43	86	85	112	85	99	54	70	68	37	d__Bacteria; p__Chloroflexi; c__Gitt-GS-136; o__norank; f__norank; g__norank; s__uncultured_bacterium
OTU2991	10	1	4	6	2	2	6	10	4	3	10	2	9	4	7	7	4	3	d__Bacteria; p__Proteobacteria; c__Alphaproteobacteria; o__Rhizobiales
OTU3017	3	2	6	9	1	1	7	10	12	7	6	5	11	7	6	10	13	5	d__Bacteria; p__Proteobacteria; c__Alphaproteobacteria; o__Rhodospirillales; f__DA111; g__norank
OTU3022	5	23	15	20	24	4	33	25	18	25	29	26	24	17	7	17	24	12	d__Bacteria; p__Actinobacteria; c__Actinobacteria; o__norank; f__norank; g__norank
OTU3025	20	24	20	149	259	344	26	51	20	55	35	33	90	52	23	21	22	11	d__Bacteria; p__Actinobacteria; c__Actinobacteria; o__Micrococcales; f__Micrococcaceae; g__Kocuria; s__Kocuria_polaris
OTU3031	10535	10981	10568	6005	7942	1155	1922	1160	2282	2490	3372	3643	268	2497	4251	200	852	373	d__Bacteria; p__Firmicutes; c__Bacilli; o__Bacillales; f__Bacillaceae; g__Bacillus
OTU3034	2	2	1	5	6	4	8	15	7	7	2	8	9	7	4	4	6	5	d__Bacteria; p__Actinobacteria; c__Actinobacteria; o__Acidimicrobiales; f__Acidimicrobiaceae; g__uncultured
OTU3038	3	5	2	26	7	5	9	13	23	7	14	4	7	15	9	6	6	4	d__Bacteria; p__Proteobacteria; c__Alphaproteobacteria; o__Rhodospirillales; f__Rhodospirillales_Incertae_Sedis; g__Candidatus_Alysiosphaera; s__uncultured_bacterium
OTU3040	1	1	12	5	6	2	3	2	2	5	4	5	2	6	1	2	2	1	d__Bacteria; p__Chloroflexi; c__Anaerolineae; o__Anaerolineales; f__Anaerolineaceae; g__uncultured
OTU3046	4	9	2	4	8	3	3	3	7	7	5	3	5	2	2	5	2	1	d__Bacteria; p__Chloroflexi; c__Chloroflexia; o__Chloroflexales; f__Roseiflexaceae; g__Roseiflexus
OTU3049	29	6	27	14	17	6	44	53	57	34	31	39	50	39	22	65	39	42	d__Bacteria; p__Actinobacteria; c__Actinobacteria; o__Solirubrobacterales; f__Solirubrobacteraceae; g__Solirubrobacter; s__uncultured_Solirubrobacter_sp.
OTU3050	2	5	5	22	11	1	26	21	21	12	26	27	28	24	25	27	35	23	d__Bacteria; p__Proteobacteria; c__Alphaproteobacteria; o__Caulobacterales; f__Caulobacteraceae; g__Phenylobacterium; s__uncultured_organism
OTU3060	3	2	6	5	5	1	8	5	3	15	7	10	11	14	2	8	5	1	d__Bacteria; p__Chloroflexi; c__Anaerolineae; o__Anaerolineales; f__Anaerolineaceae; g__uncultured; s__uncultured_sludge_bacterium_S41
OTU3061	3	1	22	11	7	7	3	5	5	4	4	12	8	4	7	9	9	10	d__Bacteria; p__Saccharibacteria; c__norank; o__norank; f__norank; g__norank
OTU3064	10	17	14	32	41	93	58	82	63	50	43	27	29	37	15	19	37	82	d__Bacteria; p__Chloroflexi; c__Chloroflexia; o__Kallotenuales; f__AKIW781; g__norank; s__uncultured_Kouleothrix_sp.
Sum sequence	31688	31280	31251	28576	30125	22507	22954	22520	24613	23758	23939	24575	22225	22696	25838	20913	20607	15665
Total sequences	37332	37332	37332	37332	37332	37332	37332	37332	37332	37332	37332	37332	37332	37332	37332	37332	37332	37332
%	0.848816	0.837887	0.83711	0.765456	0.806948	0.602888	0.614861	0.603236	0.6593	0.636398	0.641246	0.658282	0.595334	0.60795	0.692114	0.56019	0.551993	0.419613
Shared OTUs	394	394	394	394	394	394	394	394	394	394	394	394	394	394	394	394	394	394
Total OTUs	1197	1249	1279	1825	1687	1271	2245	2153	2178	2242	2202	2152	2307	2258	2084	2158	2199	1882
%	0.329156	0.315452	0.308053	0.21589	0.233551	0.309992	0.175501	0.183	0.1809	0.175736	0.178928	0.183086	0.170785	0.174491	0.18906	0.182576	0.179172	0.209352
