# Supplementary material for: Development of bacterial communities in biological soil crusts alonga revegetation chronosequence in the Tengger Desert, northwest China
Source: Copernicus journal article supplement (doi:10.5194/bg-2017-139), 2017-04-18
Supplement: Supplementary file 4 [file Table S4.xlsx]

## Sheet: Table S4
Table S4. Genera with relative abundance > 1 % in any sample of BSCs (%). MS, 5YR, 15YR, 28YR, 34YR and 51YR represent mobile sand, 5-, 15-, 28-, 34- and 51-year-old BSCs, respectively. Triplicate samples were analyzed in each age of BSCs.
Taxon	MS	5YR	15YR	28YR	34YR	51YR
Bacillus	0.310636	0.145969	0.051734	0.0913693	0.0675649	0.0139291
Enterococcus	0.174551	0.0832798	0.0254295	0.0455463	0.0370638	0.00585735
Lactococcus	0.157916	0.0736901	0.0247777	0.0394389	0.0332155	0.00648237
RB41_norank	0.00548234	0.00905389	0.0644309	0.0354209	0.0330815	0.0482696
JG34-KF-361_norank	0.00222329	0.00605379	0.0366263	0.0362959	0.0311083	0.0323762
Acidimicrobiales_uncultured	0.0153309	0.012429	0.0252955	0.027501	0.0280903	0.0246705
JG34-KF-161_norank	0.00323226	0.0123219	0.0241616	0.0248402	0.0274831	0.0358941
JG30-KF-CM45_norank	0.00391978	0.0120719	0.0281081	0.0296796	0.0261081	0.0243759
Microvirga	0.00686632	0.0173756	0.0256884	0.0140719	0.0242152	0.0210722
Actinobacteria_norank	0.00781278	0.00536626	0.0144202	0.0334119	0.0219294	0.0248937
Rubrobacter	0.00237508	0.00850923	0.0224383	0.0262242	0.0224115	0.0206615
Geodermatophilus	0.00485732	0.0158131	0.0196436	0.0153845	0.0195186	0.0163845
Blastococcus	0.00582164	0.0134201	0.0169113	0.0154202	0.0210722	0.0181703
Bosea	0.0047591	0.0160274	0.01884	0.011304	0.0166792	0.0181792
Enterobacteriaceae_unclassified	0.0421711	0.0170988	0.0050984	0.0110361	0.00758956	0.0012054
AT425-EubC11_terrestrial_group_norank	0.00316976	0.0182774	0.014697	0.0143309	0.015947	0.0146612
Micromonosporaceae_unclassified	0.00190185	0.00288403	0.0160988	0.0135719	0.0168399	0.0263492
Alkaliphilus	0.0383317	0.0152773	0.00486625	0.00941998	0.00655381	0.00125004
Microcoleus	0.000312511	0.0424569	0.0103575	0.00116968	0.00637523	0.0134112
AKIW781_norank	0.00294653	0.00925033	0.0156077	0.0108307	0.0123665	0.0175899
Arthrobacter	0.0128397	0.0215722	0.00708954	0.00916104	0.0144737	0.00282153
C0119_norank	0.000535733	0.00112504	0.0174828	0.0111879	0.0206525	0.0165631
Roseiflexus	0.00398229	0.00640201	0.0179114	0.0130005	0.0149023	0.00916997
Solirubrobacterales_unclassified	0.00186614	0.0020715	0.0107772	0.0123665	0.016947	0.0168488
Subgroup_6_norank	0.0032144	0.00415193	0.010804	0.014938	0.0122951	0.0122415
Rubellimicrobium	0.00451802	0.0219026	0.00880389	0.00632165	0.00697346	0.00813422
0319-6M6_norank	0.00350905	0.00350013	0.013313	0.0130005	0.0110183	0.0107147
Phormidium	0.000267867	0.0467606	0.00236616	0.000196436	0.000437516	0.000491089
TK10_norank	0.00209829	0.00362513	0.0120897	0.0107325	0.0102414	0.0106075
Mastigocladopsis	8.92889e-06	0.000455373	0.01067	0.00632165	0.00335726	0.0264474
Rhizobiales_unclassified	0.00121433	0.00308047	0.010295	0.00708954	0.00827708	0.0104825
Bryobacter	0.0015447	0.00252688	0.0106432	0.00667881	0.00861638	0.00990214
Acidimicrobiales_unclassified	0.00121433	0.002009	0.00936641	0.00615201	0.011054	0.00979499
Patulibacter	0.00441087	0.00391978	0.0114826	0.00734848	0.005902	0.00536626
Blastocatella	0.00100004	0.00393764	0.0111611	0.00786635	0.0052859	0.00833958
Marmoricola	0.00130362	0.00286617	0.00749134	0.00504482	0.00650023	0.0127951
ABS-19_norank	0.00133933	0.0013304	0.0108575	0.0101254	0.0056877	0.00421444
Gitt-GS-136_norank	0.00159827	0.00291975	0.00530376	0.0106075	0.00584842	0.00439301
Cyanobacteria_norank	0.000446445	0.00088396	0.00550913	0.00193757	0.00377692	0.0170095
Pseudonocardia	0.000776813	0.00450016	0.00450909	0.00426801	0.00442873	0.0103307
Chloroflexi_unclassified	0.000330369	0.000473231	0.00128576	0.00144648	0.00609843	0.0179024
Carnobacterium	0.0114201	0.00512518	0.00165184	0.00296439	0.00200007	0.000250009
Oceanobacillus	0.0106254	0.00515197	0.00174113	0.00306261	0.00226794	0.000464302
Trichocoleus	0	0.0219472	2.67867e-05	8.036e-05	8.036e-05	0.0010804
SubsectionIII_FamilyI_norank	0	0.0224919	8.92889e-05	2.67867e-05	9.82178e-05	0.000303582
SubsectionIII_FamilyI_unclassified	8.92889e-06	0.0118754	0.00233937	0.00169649	0.000705382	0.00334833
DA101_soil_group_norank	0.000205364	0.000625022	0.00306261	0.00147327	0.00215186	0.0115451
Others	0.135103	0.256143	0.326646	0.318636	0.334708	0.372754
unlassified genera
Enterobacteriaceae_unclassified	0.0421711	0.0170988	0.0050984	0.0110361	0.00758956	0.0012054
Micromonosporaceae_unclassified	0.00190185	0.00288403	0.0160988	0.0135719	0.0168399	0.0263492
Solirubrobacterales_unclassified	0.00186614	0.0020715	0.0107772	0.0123665	0.016947	0.0168488
Rhizobiales_unclassified	0.00121433	0.00308047	0.010295	0.00708954	0.00827708	0.0104825
Acidimicrobiales_unclassified	0.00121433	0.002009	0.00936641	0.00615201	0.011054	0.00979499
Chloroflexi_unclassified	0.000330369	0.000473231	0.00128576	0.00144648	0.00609843	0.0179024
SubsectionIII_FamilyI_unclassified	8.92889e-06	0.0118754	0.00233937	0.00169649	0.000705382	0.00334833
Sum	0.0487071	0.0394925	0.0552609	0.053359	0.0675113	0.0859316
