# Supplementary material for: Development of bacterial communities in biological soil crusts alonga revegetation chronosequence in the Tengger Desert, northwest China
Source: Copernicus journal article supplement (doi:10.5194/bg-2017-139), 2017-04-18
Supplement: Supplementary file [file bg-2017-139-AC1-supplement.pdf]

1     **Development of bacterial communities in biological soil crusts along**  
2             **a revegetation chronosequence in the Tengger Desert, northwest**  
3                             **China**

4  
5     *Author names and affiliations:*

6     Lichao Liu<sup>1</sup>, Yubing Liu<sup>1,2\*</sup>, Peng Zhang<sup>1</sup>, Guang Song<sup>1</sup>, Rong Hui<sup>1</sup>, Zengru Wang<sup>1</sup>, Jin Wang<sup>1,2</sup>

7     <sup>1</sup>Shapotou Desert Research & Experiment Station, Northwest Institute of Eco-Environment and Resources, Chinese  
8     Academy of Sciences, Lanzhou, 730000, China

9     <sup>2</sup>Key Laboratory of Stress Physiology and Ecology in Cold and Arid Regions of Gansu Province, Northwest Institute  
10    of Eco-Environment and Resources, Chinese Academy of Sciences, Lanzhou 730000, China

11  
12    \* *Corresponding author:* Yubing Liu

13    Address: Donggang West Road 320, Lanzhou 730000, P. R. China.

14    Tel: +86 0931 4967202.

15    E-mail address: liuyb@lzb.ac.cn

16  
17    **Abstract.** Knowledge of structure and function of microbial communities in different  
18    successional stages of biological soil crusts (BSCs) is still scarce for desert areas. In this study,  
19    Illumina MiSeq sequencing was used to assess the composition changes of bacterial communities  
20    in different ages of BSCs in the revegetation of Shapotou in the Tengger Desert. The most dominant  
21    phyla of bacterial communities shifted with the changed types of BSCs in the successional stages,  
22    from Firmicutes in mobile sand and physical crusts to Actinobacteria and Proteobacteria in BSCs,  
23    and the most dominant genera shifted from *Bacillus*, *Enterococcus* and *Lactococcus* to  
24    RB41\_norank and JG34-KF-361\_norank. Alpha diversity and quantitative real-time PCR analysis  
25    indicated that bacteria richness and abundance reached their highest levels after 15 years of BSC  
26    development. Redundancy analysis showed that silt+clay content and total K were the prime  
27    determinants of the bacterial communities of BSCs. The results suggested that bacterial  
28    communities of BSCs recovered quickly with the improved soil physicochemical properties in the

29 early stages of BSC succession. Change in the bacterial community structures may be an important  
30 indicator in the biogeochemical cycling and nutrient storage in early successional stages of BSCs in  
31 desert ecosystems.

32 **Key words** biological soil crusts (BSCs), successional stages, bacterial community, revegetation,  
33 desert ecosystem

## 34 **1 Introduction**

35 Biological soil crusts (BSCs) are assemblages of cryptogamic species and microorganisms, such  
36 as cyanobacteria, green algae, diatoms, lichens, mosses, soil microbes and other related  
37 microorganisms that cement the surface soil particles through their hyphae, rhizines/rhizoids and  
38 secretions (Eldridge and Greene, 1994; Li, 2012; Pointing and Belnap, 2012; Weber et al., 2016).  
39 Due to their specialized structures and complicated assemblages of their members, BSCs constitute  
40 one of the most important landscapes and make up 40 % of the living cover of desert ecosystems,  
41 even exceeding 75 % in some special habitats (Belnap and Eldridge, 2003). It is well known that  
42 BSCs play critical roles in the structure and function of semi-arid and arid ecosystems (Eldridge and  
43 Greene, 1994; Li, 2012). They contribute to ecological services such as soil stabilization, reduction  
44 of wind and water erosion, and facilitation of higher plant colonization (Belnap, 2003; Belnap and  
45 Lange, 2001; Maier et al., 2014; Pointing and Belnap, 2012). BSCs generally experience the main  
46 successional stages in desert ecosystems: mobile sand, algal crust, lichen crust and moss crust (Lan  
47 et al., 2012a; Liu et al., 2006). The different successional stages of BSCs vary in their ecological  
48 function (Belnap, 2006; Bowker and Belnap, 2007; Li, 2012; Moquin et al., 2012).

49 Bacteria are the most abundant microorganisms and play important roles in the development  
50 process of BSCs (Bates et al., 2010; Green et al., 2008; Gundlapally and Garcia-Pichel, 2006). They  
51 can decompose organic material and release nutrients, mediating geochemical processes necessary  
52 for ecosystem functioning in the persistence of BSCs (Balsler and Firestone, 2005). Species  
53 composition and community structure of bacteria change greatly during the successional process of  
54 BSCs (Gundlapally et al., 2006; Moquin et al., 2012; Zhang et al., 2016). Most research on  
55 prokaryotic diversity of BSCs has focused on cyanobacteria-dominated biocrusts in arid and semi-  
56 arid regions (Abed et al., 2010; Garcia-Pichel et al., 2001; Nagy et al., 2005; Steven et al., 2013;  
57 Yeager et al., 2004). Recent studies of the bacterial community structure of bryophyte- or lichen-

58 dominated crusts indicate that lichen-associated communities encompass a wide taxonomic  
59 diversity of bacteria (Bates et al., 2011; Cardinale et al., 2008; Maier et al., 2014). Heterotrophic  
60 bacteria may perform a variety of roles such as nutrient mobilization and nitrogen (N) fixation and  
61 could be of considerable importance for the stability of lichen-dominated soil communities.  
62 However, there have been few studies on changes of bacterial diversity and their function in BSCs  
63 during the development process in desert zones, and these only in the Sonoran (Nagy et al., 2005)  
64 and Gurbantunggut Deserts (Zhang et al., 2016). What changes occur in bacterial community  
65 composition and their **potential** roles in improving soil properties in different successional stages of  
66 BSCs? What is the significance of these changes on BSC succession in the recovery process of  
67 desert revegetation in temperate zones?

68 A recent study on crusts in the Tengger Desert, China, showed that bacterial diversity and  
69 richness were highest after 15 years, and at least 15 years might be needed for recovery of bacterial  
70 abundance of BSCs (Liu et al., 2017). To better understand these questions, we must analyze in  
71 detail the bacterial community composition of BSCs at all levels of classification and their  
72 corresponding function in the recovery process of BSCs. In the present study, bacterial community  
73 composition and potential function were analyzed in BSCs along a chronosequence of over 50-year-  
74 old revegetation. We hypothesized that bacteria **play important roles** in carbon (C) accumulation  
75 and soil improvement in early stages of BSC succession.

## 76 **2 Materials and methods**

### 77 **2.1 Study site description**

78 The study site is located at Shapotou, southeast fringe of the Tengger Desert, northwest China.  
79 The nature landscape is characterized by the reticulated chains of barchan dunes with the vegetation  
80 cover less than 1%. The mean annual precipitation is about 180 mm with large seasonal and inter-  
81 annual variation. The mean wind speed is 3.5 m/s, and the average days with dust events are 122 d  
82 per year. The revegetation protection system for Bao–Lan railway in this area was established  
83 initially in 1956, and was expanded in 1964, 1973, 1981 and later through the plantation of the  
84 xerophilous shrubs. This unirrigated revegetation system works quite well to protect the railroad  
85 line from sand bury and dust hazard during past sixty years. Also, the experimental plots of less  
86 than one hectare were established with the same plantation techniques by the Shapotou desert

87 research and experiment station in 1987, 2000, and 2010 in the nearby sand dunes. These sand fixed  
88 areas provide an ideal temporal succession sequence for studying the variation of environmental  
89 factors following plantation in the floating sand. As mentioned in other literatures, the initial state  
90 of BSCs began to form following the stabilization of sand dunes and developed with the colonization  
91 of cryptogam (Liu, et al, 2006). The appeared BSCs can be divided into four types, such as physical  
92 crusts, algal-dominated, lichen-dominated and moss-dominated crusts. In this study, we selected  
93 BSCs from the revegetation established in 1964, 1981, 1987, 2000 and 2010, and non-fixed mobile  
94 sand as the control (Figure 1). BSCs were sampled in November 2015, and named according to the  
95 fixed-sand time as 51YR (51 years of revegetation), 34YR, 28YR, 15YR, 5YR and MS, respectively.  
96 The main types of BSCs were cyanobacteria–lichen- and moss-dominated crusts from 15YR to  
97 51YR.

## 98 **2.2 BSC sampling**

99 In each revegetation, BSC samples were collected in early November 2015. Five soil cores (3.5-  
100 cm diameter) with crust layers from four vertices of a square (20-m length) and a diagonal crossing  
101 point in each plot (Figure 1 C) were sampled individually using a sterile trowel. To decrease spatial  
102 heterogeneity, each BSC sample was taken from six individual plots (at least 20 m between two  
103 adjacent plots) from each revegetation time. Therefore, we obtained 30 BSC samples in total (5  
104 cores × 6 individual plots) and these were mixed together to form one composite BSC sample.  
105 Triplicate composite samples for each revegetation time were collected and the BSC samples were  
106 preserved in an ice box. Samples were then taken back to the laboratory, immediately sieved (by 1  
107 mm) to remove stones and plant roots, homogenized thoroughly and stored at –70 °C for subsequent  
108 analyses.

## 109 **2.3 DNA extraction and Illumina MiSeq sequencing**

110 Microbial DNA was extracted from BSC samples using E.Z.N.A Soil DNA (Omega Bio-tek,  
111 Norcross, GA, U.S.) according to the manufacturer's protocols. The extracted DNA was diluted in  
112 TE buffer (10 mM Tris–HCl and 1 mM EDTA at pH 8.0) and stored at –20 °C until use. An aliquot  
113 of the extracted DNA from each sample was used as a template for amplification. The bacteria 16S  
114 ribosomal RNA gene was amplified by PCR (95 °C for 3 min, followed by 25 cycles at 95 °C for  
115 30 s, 55 °C for 30 s and 72 °C for 45 s, and a final extension at 72 °C for 10 min) using primers

116 338F (5'-ACTCCTACGGGAGGCAGCA-3') and 806R (5'-GGACTACHVGGGTWTCTAAT-3').  
117 PCRs were performed in triplicate 20- $\mu$ L mixture containing 2  $\mu$ L of 5  $\times$  FastPfu Buffer, 2  $\mu$ L of  
118 2.5 mM dNTPs, 0.8  $\mu$ L of each primer (5  $\mu$ M), 0.2  $\mu$ L of FastPfu Polymerase and 10 ng of template  
119 DNA. This was conducted according to Wang et al. (2015). Amplicons were extracted from 2 %  
120 agarose gels and purified using the AxyPrep DNA Gel Extraction Kit (Axygen Biosciences, Union  
121 City, CA, USA) according to the manufacturer's instructions and quantified using QuantiFluor™ -  
122 ST (Promega Corporation, Madison, WI, USA).

123 Purified amplicons were pooled in equimolar and paired-end sequenced (2  $\times$  300) on an Illumina  
124 MiSeq platform according to the standard protocols at Majorbio Bio-Pharm Technology Co. Ltd.,  
125 Shanghai, China (<http://www.majorbio.com>). The raw reads were deposited in the NCBI Sequence  
126 Read Archive database (Accession number: SRP091312).

## 127 **2.4 Quantitative real-time PCR (qPCR)**

128 qPCR was performed to determine the absolute 16S rRNA gene abundance. We used the primer  
129 sets of 515F (5'-GTGCCAGCMGCCGCGGTAA-3') and 806R to quantify the total bacterial  
130 populations. The standard templates were made from 10-fold dilutions of linearized plasmids  
131 containing the gene fragment of interest that was cloned from amplified pure culture DNA. The 20  
132  $\mu$ L reaction mixtures contained 10  $\mu$ L of 2  $\times$  SYBR Mix (with ROX) (DBI Bioscience,  
133 Ludwigshafen, Germany), 0.4  $\mu$ L each of 10  $\mu$ M forward and reverse primers, 1  $\mu$ L of total DNA  
134 template (1 ng/ $\mu$ L) and 8.2  $\mu$ L of RNase-free ddH<sub>2</sub>O. The reaction was conducted on a Stratagene  
135 Mx3000P Real-time PCR system (Stratagene, Agilent Technologies Inc., Santa Clara, CA, USA)  
136 using the following program: 94  $^{\circ}$ C for 3 min followed by 40 cycles of 94  $^{\circ}$ C for 30 s, 58  $^{\circ}$ C for 30  
137 s and 72  $^{\circ}$ C for 30 s, then 72  $^{\circ}$ C for 2 min. The detection signal was collected at 72  $^{\circ}$ C for 30 s and  
138 analyzed. The melting curve was obtained to confirm that the amplified products were of the  
139 appropriate size. For each soil sample, the qPCRs were repeated six times.

## 140 **2.5 Processing of sequencing data**

141 Raw fastq files were demultiplexed, quality-filtered using QIIME (version 1.17) with the  
142 following criteria: (i) The 300-bp reads were truncated at any site receiving an average quality score  
143 < 20 over a 50-bp sliding window, discarding the truncated reads shorter than 50 bp; (ii) exact  
144 barcode matching, two nucleotide mismatch in primer matching, reads containing ambiguous

145 characters were removed and (iii) only sequences that overlapped > 10 bp were assembled according  
146 to their overlap sequence. Reads that could not be assembled were discarded.

147 Operational taxonomic units (OTUs) were clustered with 97 % similarity cut-off using UPARSE  
148 (version 7.1 <http://drive5.com/uparse/>) and chimeric sequences were identified and removed using  
149 UCHIME. The taxonomy of each 16S rRNA gene sequence was analyzed by RDP Classifier  
150 (<http://rdp.cme.msu.edu/>) against the SILVA (SSU115) 16S rRNA database using a confidence  
151 threshold of 70 %. Hierarchical clustering analysis was performed using CLUSTER and visualized  
152 using TREEVIEW, and other statistical analyses were performed with the IEG pipeline  
153 (<http://ieg.ou.edu>). The average data were calculated for BSCs of each revegetation before analyzing  
154 the unique and shared OTUs/genera. The figures were generated with OriginPro 9.1 and Excel 2013.  
155 Alpha-diversity analysis was used to reflect the richness and diversity of microbial communities. In  
156 order to investigate the overall differences in community composition among the samples, principal  
157 component analysis (PCA) was performed using unweighted UniFrac distance (Lozupone and  
158 Knight, 2005). Redundancy analysis (RDA) was used to assess the relationship between bacterial  
159 compositions of BSCs and top soil physicochemical properties by permutation test analysis (Zhang  
160 et al., 2016). Phylogenetic analysis of the top abundance genus were aligned with closely related  
161 16S rRNA gene sequences, previously selected according to initial BLAST analyses and  
162 downloaded from the NCBI website (<http://www.ncbi.nlm.nih.gov>), using CLUSTAL W  
163 (Gundlapally and Garcia-Pichel, 2006). Phylogenetic trees were constructed using approximately-  
164 maximum-likelihood routine by FastTree (version 2.1.3 <http://www.microbesonline.org/fasttree/>).

## 165 **3 Results**

### 166 **3.1 Overview of sequencing and bacterial diversity**

167 Illumina MiSeq sequencing was used to assess the bacterial community composition and  
168 diversity of BSCs in successional stages for revegetation in Shapotou. Total 18 libraries of bacterial  
169 16S rRNA were constructed, at least 37,332 effective sequences in each sample were obtained, and  
170 an average length of 437 bp. 1197–2307 OTUs were generated using a threshold of 0.97 (Table S1).  
171 394 OTUs were shared and occupied a relatively high proportion among all samples (17.07–32.92 %)  
172 (Table S2), and these OTUs accounted for 41.96–84.88 % of the total sequences (Table S2). This  
173 indicated a high coherence of community among these soil crusts. Alpha-diversity analysis revealed

174 the microbial richness and diversity. Rarefaction curves showed that the most bacterial OTUs were  
175 found in 51YR crust, whereas MS contained the fewest. The number of OTUs was almost the same  
176 from 15YR to 51YR (Figure 2). Community richness estimation using ACE and Chao revealed a  
177 similar trend to that for community diversity, which was further supported by Shannon's indexes  
178 (Table S1). Hierarchical clustering analysis (Figure 3 A) and PCA (Figure 3 B) showed that the  
179 triplicate samples of each age of BSCs were clustered, verifying that the sequencing results were  
180 reliable and the samples were reproducible.

### 181 **3.2 Bacterial community composition at high taxonomic levels**

182 In the bacterial community, a total of 28 phyla were retrieved at genetic distances of 3 %, and  
183 they clustered into four groups according to their relative abundance (Figure 4). Of the total  
184 sequences, 4.48 % were not classified at the phylum level. The percentages of major phyla for each  
185 age of BSCs are shown in Figure 5. The most abundant phylum shifted from Firmicutes (72.8 %)  
186 in MS and 5YR to Actinobacteria in BSCs (minimum 27.4 % in 15YR and maximum 30.7 % in  
187 51YR). The following major phyla were at high abundance (> 10 % of total OTUs): Proteobacteria,  
188 Chloroflexi, Acidobacteria and Cyanobacteria. The low-abundance phyla (1 % < of total OTUs <  
189 10 %) were Gemmatimonadetes, Bacteroidetes, Armatimonadetes, Verrucomicrobia and  
190 Deinococcus-Thermus. The percentages of Proteobacteria, Chloroflexi and Acidobacteria were  
191 nearly the same after 15 years of development of BSCs. Cyanobacteria, in addition to the high  
192 proportion for 15YR (16.13 %), also had a high proportion in 51YR (9.32 %). The other 17 phyla  
193 were all < 1 % of total OTUs and so were removed from further analysis.

194 At the class level (Table 1), 95.61 % of sequences were assigned, and there was considerable  
195 consistency in dominant classes among the crusts. Bacilli was the largest class in MS and 5YR with  
196 sequence percentages of 68.73 and 32.62 %, respectively; and Actinobacteria was the predominant  
197 class from 15YR to 51YR. In addition to subdivisions of Proteobacteria, other major classes  
198 included Acidobacteria, Cyanobacteria, Chloroflexi, Clostridia, Cytophagia, Deinococci,  
199 Gemmatimonadetes, Ktedonobacteria, Sphingobacteria and Thermomicrobia. The percentages of  
200 high (> 10 % of total OTUs) and low abundance (1 % < of total OTUs < 10 %) classes decreased  
201 from 98 % in MS to 89.29 % in 51YR, and minor and unclassified classes increased from 1.96 %  
202 in MS to 10.67 % in 51YR.

203 At the family level, there were 133 identified families (data not shown), with the most abundant  
204 families being Bacillaceae, Enterococcaceae and Streptococcaceae (Table S3). Other dominant  
205 families were Geodermatophilaceae, JG34-KF-161, JG34-KF-361, Methylobacteriaceae,  
206 Micromonosporaceae, Bradyrhizobiaceae and Enterobacteriaceae.

### 207 **3.3 Characterization of major genera and species**

208 A large proportion of sequences were not assigned to any genera. Even for genera with relative  
209 abundance > 1 % in any samples, unclassified sequences occupied a high proportion (4.87–8.59 %).  
210 Moreover, higher percentages of total sequences (from 13.51 % in MS to 37.28 % in 51YR) were  
211 found in low-abundance genera (< 1 % in any samples) (Table S4). A total of 460 genera were found  
212 in the crusts, of which 201 were shared by all BSC samples (data not shown). The major genera in  
213 each age of BSCs are summarized in Figure 6. *Bacillus*, *Enterococcus* and *Lactococcus* were the  
214 primary genera and represented 64.31 % of the total sequences in MS, and decreased to 30.20 % in  
215 5YR and only 2.63 % in 51YR, indicating that these three genera were predominant in mobile sand  
216 or physical crusts. Enterobacteriaceae\_unclassified and *Alkaliphilus* were low-abundance genera in  
217 MS. With the decrease in the three primary genera from MS to 51YR, a series of genera increased  
218 in BSCs compared with MS and 5YR, including RB41\_norank, JG34-KF-361\_norank,  
219 Acidimicrobiales\_uncultured, JG34-KF-161\_norank, JG30-KF-CM45\_norank, *Microvirga*,  
220 Actinobacteria\_norank and *Rubrobacter* (relative abundance > 2 %).

221 The phylogenetic relationships of the 30 most abundant genera are shown in Figure 7. They  
222 clustered into three groups at the phylum level: Actinobacteria formed one group and included 10  
223 genera; another group was Firmicutes and Proteobacteria; and Cyanobacteria, Chloroflexi and  
224 Deinococcus-Thermus formed the third group. The genera *Bryobacter* and *Blastocatella* in phylum  
225 Acidobacteria were divided into two different groups.

226 *Bacillus* was the primary genus and represented 31 % sequences in MS (Table S4). An  
227 unclassified species in this genus reached nearly 30 % relative abundance in MS (Figure 8). In the  
228 *Enterococcus* genus, another core component, there was also an unclassified species with high  
229 abundance. In the core species (Figure 8), *Bacillus\_unclassified*, *Enterococcus\_unclassified*,  
230 *Lactococcus\_piscium*, Enterobacteriaceae\_unclassified and *Alkaliphilus\_oremlandii*\_OhILAs were  
231 predominant and decreased from MS to 51YR; only *Acidimicrobiales\_unclassified* increased, and



232 this represented the highest proportion in 51YR (2.62 %). The relative abundance of the primitive  
233 species in MS and physical crusts decreased in BSCs (from 15YR to 51YR) because of the increased  
234 numbers of species. There was little difference in numbers of genera and species among biocrusts  
235 (from 15YR to 51YR), only in sequence numbers.

### 236 **3.4 Relationships between bacterial community structure and soil**

#### 237 **physicochemical properties**

238 RDA (Figure 9) and hierarchical clustering analysis (Figure 3) were used to discern the  
239 correlations between bacterial communities and soil physicochemical properties. **Taking into**  
240 **account the likely changes in the soil properties from samples with the same successional stages**  
241 **in the same experimental site, we selected soil biogeochemical data collected from 2005 in the RDA**  
242 **(data from Li et al., 2007a; Table S5).** The BSC grouping patterns of bacterial communities at the  
243 phylum and genus levels were similar to the OTU level, with all divided into two groups. Group I  
244 contained two members, MS and 5YR, which dominated the physical crusts and cyanobacterial  
245 crusts (Figure 1 A and B), and had the lowest diversities with Shannon indexes of 3.3 and 4.61, and  
246 Simpson indexes of 0.139 and 0.0531, respectively (Table S1). The remaining BSCs comprised the  
247 largest branch of Group II, which dominated BSCs composed of algae, lichens or mosses (Figure 1  
248 C–F), and had higher diversity with Shannon indexes > 6.0 (Table S1).

249 From Figure 9, it can be inferred that BSC development was associated with soil  
250 physicochemical properties. The development of microbial community structure was positively  
251 correlated with the physicochemical index except for soil bulk density. **The total variation in OTU**  
252 **data explained by the first four axes in the RDA (as constrained by the measured environmental**  
253 **variables) was 82.16%, with the first axis explaining 75.27% and the second axis explaining 4.42%.**  
254 **Of all the environmental factors, silt+clay content and total K were most strongly related to axis 1,**  
255 **with highest correlated variable (silt+clay: -0.91; total K:-0.90). Therefore, silt+clay content and**  
256 **total K were the prime determinants of BSC bacterial community development, shown by the**  
257 **positions of cluster groups along axis 1. Eight soil physicochemical variables were all significant**  
258 **testified by the permutation test analysis ( $p < 0.05$ ): pH; silt and clay content; organic C; total**  
259 **phosphorus (P), nitrogen (N) and potassium (K); electrical conductivity (EC) and water-holding**  
260 **capacity (WHC).**

### 261 **3.5 Quantification of bacterial abundance**

262 The averaged bacterial abundance in MS was  $1.12 \times 10^6$  copies (16S rRNA gene) per gram of  
263 soil (Table 2). Similar to the shift of bacterial richness, gene copies increased quickly in the initial  
264 15 years of BSC development, and reached the approximate highest level of  $2.70 \times 10^8$  copies in  
265 15YR. There were no significant differences among 28YR, 34YR and 51YR.

## 266 **4 Discussion**

267 Due to the species concept is relatively well-defined in BSC organisms, BSCs may act as a  
268 useful model system for diversity-function research. Their functional attributes are relatively well-  
269 known and estimation and manipulation of biodiversity in experiments are feasible, at least within  
270 some groups of BSC biota (Bowker et al., 2010). This relationship is more easily interpreted in  
271 artificially-constructed BSCs. During successional stages of BSCs, physical crusts in mobile sand  
272 contain the lowest C and N contents (Zhang et al., 2009). Algal crust is the earliest biocrust stage.  
273 It shows a surface thin layer which composed by aeolian-born materials and an organic layer formed  
274 by filamentous cyanobacteria associated with sand particles (Housman et al., 2006; Zhang, 2005;  
275 Zhang et al., 2009). Lichen and moss appear following with stabilization of the algal filaments on  
276 the soil surface. The C and N fixation rates are increased in lichen crust (Evans and Lange, 2003;  
277 Lan et al., 2012b; Zhang et al., 2010), and there is higher photosynthesis, exopolysaccharide and  
278 nitrogenase activity in moss crust compared to the early successional crusts (Housman et al., 2006;  
279 Lan et al., 2012b). In the successional process of BSCs, the microbial composition and community  
280 structure change greatly (Hu and Liu, 2003; Zhang et al., 2009). Crust succession is positively  
281 correlated with phospholipid fatty acid content and microbial biomass (Liu et al., 2013). The  
282 microbial biomass of soils is the most important driving force in most terrestrial ecosystems, largely  
283 due to control of conversion rates and mineralization of organic matter (Albiach et al., 2000;  
284 Baldrian et al., 2010). Bacteria have a highest proportion of the microbial biomass in soils (Maier  
285 et al., 2014; Wang et al., 2015), and thus have important roles in the successional process of BSCs.

### 286 **4.1 Impact of BSC age on bacterial community composition**

287 In the present study, we gained information concerning the diversity of bacterial communities  
288 in BSCs of different ages in restored vegetation at Shapotou in the Tengger Desert. The 16S rRNA  
289 gene-based amplicon survey revealed the dominance of Actinobacteria, Proteobacteria, Chloroflexi,

290 Acidobacteria and Cyanobacteria in all BSCs, with Firmicutes dominating MS (72.8 %) and  
291 decreasing to 3.05 % in 51YR, and Actinobacteria increasing from 15YR (27.4 %) to 51YR (30.7 %).  
292 Due to different arid conditions, comparisons with other studies of BSCs should be viewed with  
293 caution. Cyanobacteria, Actinobacteria, Proteobacteria and Acidobacteria are ubiquitous in soils  
294 and sediments everywhere, in arid as well as wet landscapes (Fierer et al. 2012), and Proteobacteria  
295 are very common and diverse among all BSCs. We observed that Actinobacteria were the most  
296 abundant phylum in the developing (15YR, 28YR and 34YR) and relatively developed (51YR)  
297 BSCs, similar to BSCs from the Colorado Plateau and the Sonoran Desert, where Actinobacteria  
298 were dominant (Gundlapally and Garcia-Pichel 2006; Nagy et al. 2005; Steven et al. 2013).  
299 Actinobacteria and Proteobacteria are usually predicted to be copiotrophic groups which increase  
300 in high C environments (Fierer et al., 2007). These results differ from those reported in BSCs from  
301 Oman and the Gurbantunggut Desert (Abed et al. 2010; Moquin et al., 2012; Zhang et al., 2016),  
302 and even from BSCs of natural vegetation at the edge of the Tengger Desert (Wang et al., 2015),  
303 where Proteobacteria were the most abundant phylum followed by Cyanobacteria, Actinobacteria  
304 and Chloroflexi. Unexpectedly, Cyanobacteria had a high proportion in the developed BSCs,  
305 although they were prevalent in early successional stages of BSCs (5YR) and play crucial roles in  
306 initial crust development (Belnap and Lange, 2001). This is relatively similar to that in the natural  
307 habitat around the Tengger Desert, where Cyanobacteria (19.5 %) and Actinobacteria (19.4 %) were  
308 the most dominant phyla after Proteobacteria (25.0 %). Moreover, the results did not resemble those  
309 from arid Arizona soils (Dunbar et al., 1999) or the Gurbantunggut Desert (Zhang et al., 2016) due  
310 to the high proportion of Chloroflexi, an unexplained presence of thermophilic phyla (Gundlapally  
311 and Garcia-Pichel, 2006; Moquin et al., 2012; Nagy et al., 2005) displays good adaptation to drought  
312 environment and important roles in the development of BSCs in arid zones (Lacap et al., 2011;  
313 Wang et al., 2015).

#### 314 **4.2 Function of BSC bacteria**

315 More and more information about BSC bacteria has been reported with the convenience of  
316 culture-independent sequencing methods, and studies of their function and classification in BSCs  
317 are increasingly detailed. The main function of these dominant bacteria involves the cycling and  
318 storage of C and N in desert ecosystems, which is vital to functioning of arid land (Weber et al.,

319 2016). Firmicutes are more frequently detected in below-biocrust soils (1–2 cm depth) (Elliott et al.,  
320 2014) and dominated in MS and 5YR, with the vast majority of abundant species being in Firmicutes  
321 in the Tengger Desert. Cyanobacteria are the main contributors to C and N fixation in soils during  
322 successional processes of BSCs (Belnap and Gardner, 1993). They are thought to serve as pioneers  
323 in the stabilization process of soils (Garcia-Pichel and Wojciechowski 2009), of which genus  
324 *Phormidium* is significantly more abundant in surface soils (0–1 cm depth), and genus *Microcoleus*  
325 is globally dominant as biocrust-forming microorganisms in most arid lands and their production of  
326 polysaccharide sheaths aids in formation of cm-long filament bundles (Belnap and Lange 2003;  
327 Boyer et al. 2002; Garcia-Pichel et al. 2001; Pointing and Belnap 2012). In addition to the  
328 filamentous bacteria of *Microcoleus* and *Phormidium*, *Mastigocladopsis* and *Trichocoleus* were  
329 also in the 30 most abundant genera of BSCs in Shapotou, and mainly harvest energy from light.  
330 *Pseudonocardia*, a mycelial genus of Actinobacteria, were dominant and are likely important during  
331 BSC formation (Weber et al., 2016). Proteobacteria and Bacteroidetes can produce  
332 exopolysaccharides, so they could also play roles in soil stabilization and BSC formation  
333 (Gundlapally and Garcia-Pichel 2006). Owing to limited culture collections and curated sequence  
334 databases of BSC bacteria, most non-cyanobacterial sequences from DNA-based bacterial surveys  
335 cannot be reliably named or taxonomically defined, especially in relatively abundant genera in  
336 Actinobacteria and Proteobacteria, such as *Bosea*, *Microvirga*, *Rubellimicrobium*, *Patulibacter*,  
337 *Solirubrobacter*, *Blastococcus* and *Arthrobacter* in the present study. **Different compositions of**  
338 **bacterial community play various roles in improving soil properties in different successional stages**  
339 **of BSCs, suggesting their positive potential function in soil biogeochemical cycle and ecosystem**  
340 **process.** Further discovery and characterization of the functions of these dryland-adapted bacteria  
341 is a challenging area for future study.

### 342 **4.3 Relationship between bacterial community shift and soil physicochemical** 343 **properties**

344 PCA and RDA showed that bacterial community compositions of MS and 5YR significantly  
345 differed from those of BSCs of more than 15 years in age, and were positively correlated with soil  
346 physicochemical properties. Combined with the results of alpha-diversity analysis and qPCR, this  
347 means that the species richness and abundance reached their highest levels at 15 years of BSC

348 development and then maintained similar levels thereafter. Similar trends were found in recovery  
349 of soil properties and processes after sand-binding at five different-aged revegetated sites –  
350 proportions of silt and clay, organic C increased with years since revegetation (Li et al., 2007a, b).  
351 The annual recovery rates of soil properties was greater in the initial revegetated sites (0–14 years)  
352 than that in the old revegetated sites (43–50 years) (Li et al., 2007a). These results suggest that  
353 bacterial communities of BSCs recovered quickly in the fastest recovery phase of soil properties  
354 (the initial 15 years), and the bacterial biomass increased with the improvement of soil texture and  
355 nutrients, especially silt, clay and total K content in the Tengger Desert. This may be attributed to  
356 vegetation composition, soil temperature and soil moisture, because they are key factors regulating  
357 soil microbial composition and activity (Butenschoen et al., 2011; De Deyn et al., 2009; Sardans et  
358 al., 2008), soil nutrient uptake and release (Peterjohn et al., 1994; Rustad et al., 2001), especially in  
359 the BSCs of top soil. BSC, plant and soil biochemical properties together lead to microbial diversity  
360 of BSCs in long-term revegetation, and the microorganisms in turn **have the positive influence on**  
361 **soil improvement** (Li et al., 2007b, 2010). **Many authors have interpreted correlations among**  
362 **soil properties and BSCs as an indicator that BSCs are drivers of soil fertility and development**  
363 **(Chamizo et al. 2012; Delgado-Baquerizo 2013; Yu et al. 2014; Zhang et al. 2010), a number**  
364 **of authors have reported the opposite and suggest a direct influence of soil properties on BSC**  
365 **development (Bowker et al. 2006, Rivera-Aquilar et al. 2009, Bowker and Belnap 2008, Root**  
366 **and McCune 2012, Concostrina-Zubiri et al. 2013, Belnap et al. 2014, Weber et al. 2016). These**  
367 **are important questions and parsing out the interactions of BSCs and soil biogeochemical**  
368 **properties remains an important frontier in BSC research. However, further work to identify**  
369 **controlled experimental approaches are required to answer this question as field correlations**  
370 **leave us wondering about the directionality of controls over time.**

## 371 **5 Conclusions**

372 Assessing of bacterial community structure by Illumina MiSeq sequencing showed that changes  
373 of bacterial diversity and richness were consistent with the recovery phase of soil properties in  
374 different successional stages of BSCs in the revegetation of Shapotou in the Tengger Desert. The  
375 shift of bacterial community composition in BSCs at all levels of classification was related to their  
376 corresponding function in the BSC recovery process. These results confirmed our hypothesis that

377 bacteria are **important** microorganisms in nutrition accumulation and soil improvement in early  
378 stages of BSC succession.

379

380 **Data availability.** Raw data for Illumina MiSeq sequencing of 18 samples was deposited in the  
381 NCBI Sequence Read Archive database (<https://www.ncbi.nlm.nih.gov/sra/?term=SRP091312>).

382

383 **Author contributions.** Lichao Liu and Yubing Liu designed the research. Peng Zhang, Guang Song  
384 and Rong Hui collected samples from the field. Yubing Liu and Jin Wang performed DNA  
385 extraction and quality detection. Yubing Liu analyzed the high-throughput data and prepared the  
386 manuscript with consistent contributions from Lichao Liu. **Zengru Wang analyzed the soil**  
387 **biogeochemical data and made the RDA figure.**

388

389 **Competing interests.** The authors declare that they have no conflict of interest.

390

391 **Acknowledgments.** This work was financially supported by the Creative Research Group Program  
392 of National Natural Science Foundation of China (grant No. 41621001) and the National Natural  
393 Science Foundation of China (grant No. 41371100 and 41401112).

394

## 395 **References**

396 Abed, R. M. M., Kharusi, S. A., Schramm, A., and Robinson, M. D.: Bacterial diversity, pigments and nitrogen  
397 fixation of biological desert crusts from the Sultanate of Oman, *FEMS Microbiol. Ecol.*, *72*, 418–428, 2010.

398 Albiach, R., Canet, R., Pomares, F., and Ingelmo, F.: Microbial biomass content and enzymatic activities after the  
399 application of organic amendments to a horticultural soil, *Bioresour. Technol.*, *75*, 43–48, 2000.

400 Baldrian, P., Merhautova, V., Petrankova, M., and Cajthaml, T.: Distribution of microbial biomass and activity of  
401 extracellular enzymes in a hardwood forest soil reflect soil moisture content, *Appl. Soil Ecol.*, *46*, 177–182, 2010.

402 Balsler, T., and Firestone, M.: Linking microbial community composition and soil processes in a California annual  
403 grassland and mixed-conifer forest, *Biogeochemistry*, *73*, 395–415, 2005.

404 Bates, S. T., Cropsey, G. W., Caporaso, J. G., and Knight, R.: Bacterial communities associated with the lichen  
405 symbiosis, *Appl. Environ. Microbiol.*, *77*, 1309–1314, 2011.

406 Bates, S. T., Nash, T. H., Sweat, K. G., and Garcia-Pichel, F.: Fungal communities of lichen-dominated biological

407 soil crusts: Diversity, relative microbial biomass, and their relationship to disturbance and crust cover, *J. Arid*  
408 *Environ.*, 74, 1192–1199, 2010.

409 Belnap, J., and Gardner, J. S.: Soil microstructure in soils of the Colorado Plateau: the role of the cyanobacterium  
410 *Microcoleus vaginatus*, *Great Basin Nat.*, 53, 40–47, 1993.

411 Belnap, J.: The world at your feet: desert biological soil crusts, *Front Ecol. Environ.*, 1, 181–189, 2003.

412 Belnap, J., and Eldridge, D.: Disturbance and recovery of biological soil crusts. In: Belnap J, Lange OL (eds)  
413 *Biological soil crusts: structure, function, and management, ecological studies*, vol 150. Springer, Berlin, pp 363–  
414 383, 2003.

415 Belnap, J.: The potential roles of biological soil crusts in dryland hydrologic cycles, *Hydrol. Process.*, 20, 3159–  
416 3178, 2006.

417 Belnap, J., and Lange, O.L.: *Biological Soil Crusts: Structure, Function, and Management*, Springer-Verlag, Berlin,  
418 Germany, 2001.

419 Belnap, J., Miller, D. M., Bedford, D. R., and Phillips, S. L.: Pedological and geological relationships with soil lichen  
420 and moss distribution in the eastern Mojave Desert, CA, USA, *J. Arid Environ.*, 106, 45–57, 2014.

421 Bowker, M.A., Belnap, J., Davidson, D.W., and Goldstein, H.: Correlates of biological soil crust abundance across  
422 a continuum of spatial scales: support for a hierarchical conceptual model, *J. Appl. Ecol.*, 43, 152–163, 2006.

423 Bowker, M.A., and Belnap, J.: Spatial modeling of biological soil crusts to support land management decisions:  
424 Indicators of range health and conservation/restoration value based upon the potential distribution of biological  
425 soil crusts in Montezuma Castle, Tuzigoot, Walnut Canyon, and Wupatki National Monuments, Arizona, 2007.  
426 <http://sbsc.wr.usgs.gov/crs/products/products.dbl>.

427 Bowker, M. A., and Belnap J.: A simple classification of soil types as habitats of biological soil crusts on the  
428 Colorado Plateau, USA, *J. Veg. Sci.*, 19, 831–840, 2008.

429 Bowker, M. A., Maestre, F. T., and Escolar, C.: Biological crusts as a model system for examining the biodiversity-  
430 ecosystem function relationship in soils, *Soil Biol. Biochem.*, 42, 405–417, 2010.

431 Boyer, S. L., Johansen, J. R., Flechtner, V. R., and Howard, G. L.: Phylogeny and genetic variance in terrestrial  
432 *Microcoleus* (Cyanophyceae) species based on sequence analysis of the 16S rRNA gene and associated 16S–23S  
433 ITS region, *J. Phycol.*, 38, 1222–1235, 2002.

434 Butenschoen, O., Scheu, S., and Eisenhauer, N.: Interactive effects of warming, soil humidity and plant diversity on  
435 litter decomposition and microbial activity, *Soil Biol. Biochem.*, 43, 1902–1907, 2011.

436 Cardinale, M., Castro, J. V. Jr, Müller, H., Berg, G., and Grube, M.: In situ analysis of the bacterial community

437 associated with the reindeer lichen *Cladonia arbuscula* reveals predominance of Alphaproteobacteria. *FEMS*  
438 *Microbiol. Ecol.*, 66, 63–71, 2008.

439 Chamizo, S., Cantón, Y., Miralles, I., and Domingo, F.: Biological soil crust development affects physicochemical  
440 characteristics of soil surface in semiarid ecosystems, *Soil Biol. Biochem.*, 49, 96–105, 2012.

441 Concostrina-Zubiri, L., Huber-Sannwald, E., Martínez, I., Flores, J. L., and Escudero, A.: Biological soil crusts  
442 greatly contribute to small-scale soil heterogeneity along a grazing gradient, *Soil Biol. Biochem.*, 64, 28–36, 2013.

443 De Deyn, G. B., Quirk, H., Yi, Z., Oakley, S., Ostle, N. J., and Bardgett, R. D.: Vegetation composition promotes  
444 carbon and nitrogen storage in model grassland communities of contrasting soil fertility, *J. Ecol.*, 97, 864–875,  
445 2009.

446 Delgado-Baquerizo, M., Morillas, L., Maestre, F. T., and Gallardo, A.: Biocrusts control the nitrogen dynamics and  
447 microbial functional diversity of semi-arid soils in response to nutrient additions, *Plant Soil*, 372, 643–654, 2013.

448 Dunbar, J., Takala, S., Barns, S. M., Davis, J. A., and Kuske, C. R.: Levels of bacterial community diversity in four  
449 arid soils compared by cultivation and 16S rRNA gene cloning, *Appl. Environ. Biol.*, 65, 1662–1669, 1999.

450 Eldridge, D. J., and Greene, R. S. B.: Microbiotic soil crusts – a review of their roles in soil and ecological processes  
451 in the rangelands of Australia, *Aust. J. Soil Res.*, 32, 389–415, 1994.

452 Elliott, D. R., Thomas, A. D., Hoon, S. R., and Sen, R.: Niche partitioning of bacterial communities in biological  
453 crusts and soils under grasses, shrubs and trees in the Kalahari, *Biodivers. Conserv.*, 23, 1709–1733, 2014. doi.  
454 10.1007/s10531-014-0684-8

455 Evans, R. D., and Lange, O. L.: Biological soil crusts and ecosystem nitrogen and carbon dynamics, in: Belnap, J.,  
456 Lange, O.L. (Eds.), *Biological Soil Crusts: Structure, Function, and Management*, Springer, New York, 263–279,  
457 2003.

458 Fierer, N., Bradford, M.A., and Jackson, R.B.: Toward an ecological classification of soil bacteria, *Ecology*, 88,  
459 1354–1364, 2007.

460 Fierer, N., Leff, J. W., Adams, B. J., Nielsen, U. N., Bates, S. T., Lauber, C. L., Owens, S., Gilbert, J. A., Wall, D.  
461 H., and Caporaso, G. J.: Cross-biome metagenomic analyses of soil microbial communities and their functional  
462 attributes, *PNAS*, 109, 21390–21395, 2012.

463 Garcia-Pichel, F., Lo’pez-Corte’s, A., and Nübel, U.: Phylogenetic and morphological diversity of cyanobacteria in  
464 soil desert crusts from the Colorado Plateau, *Appl. Environ. Microbiol.*, 67, 1902–1910, 2001.

465 Garcia-Pichel, F., and Wojciechowski, M. F.: The evolution of a capacity to build supra-cellular ropes enabled  
466 filamentous cyanobacteria to colonize highly erodible substrates, *PLoS One*, 4, e7801, 2009.



467 Green, L. E., Porras-Alfaro, A., and Sinsabaugh, R. L.: Translocation of nitrogen and carbon integrates biotic crust  
468 and grass production in desert grassland, *J. Ecol.*, 96, 1076–1085, 2008.

469 Gundlapally, S. R., and Garcia-Pichel, F.: The community and phylogenetic diversity of biological soil crusts in the  
470 Colorado Plateau studied by molecular fingerprinting and intensive cultivation, *Microbiol. Ecol.*, 52, 345–357,  
471 2006.

472 Gundlapally, S. R., and Garcia-Pichel, F.: The community and phylogenetic diversity of biological soil crusts in the  
473 Colorado Plateau studied by molecular fingerprinting and intensive cultivation, *Micro. Ecol.*, 52, 345–357, 2006.

474 Hu, C. X., and Liu, Y. D.: Primary succession of algal community structure in desert soil, *Acta Bot. Sin.*, 45, 917–  
475 924, 2003.

476 Housman, D. C., Powers, H. H., Collins, A. D., and Belnap, J.: Carbon and nitrogen fixation differ between  
477 successional stages of biological soil crusts in the Colorado Plateau and Chihuahuan Desert, *J. Arid Environ.*, 66,  
478 620–634, 2006.

479 Lacap, D. C., Warren-Rhodes, K. A., McKay, C. P., and Pointing, S. B.: Cyanobacteria and chloroflexi-dominated  
480 hypolithic colonization of quartz at the hyper-arid core of the Atacama Desert, Chile, *Extremophiles*, 15, 31–38,  
481 2011.

482 Lan, S. B., Wu, L., Zhang, D. L., and Hu, C. X.: Successional stages of biological soil crusts and their microstructure  
483 variability in Shapotou region (China), *Environ. Earth Sci.*, 65, 77–88, 2012a.

484 Lan, S. B., Wu, L., Zhang, D. L., and Hu, C. X.: Effects of drought and salt stresses on man-made cyanobacterial  
485 crusts, *Eur. J. Soil Biol.*, 46, 381–386, 2012b.

486 Li, X. R., He, M. Z., Duan, Z. H., Xiao, H. L., and Jia, X. H.: Recovery of topsoil physicochemical properties in  
487 revegetated sites in the sand-burial ecosystems of the Tengger Desert, northern China, *Geomorphology*, 88, 254–  
488 265, 2007a.

489 Li, X. R., Kong, D. S., Tan, H. J., and Wang, X. P.: Changes in soil and vegetation following stabilization of dunes  
490 in the southeastern fringe of the Tengger Desert, *Plant Soil*, 300, 221–231, 2007b.

491 Li, X. R., Tian, F., Jia, R. L., Zhang, Z. S., and Liu, L. C.: Do biological soil crusts determine vegetation changes in  
492 sandy deserts? Implications for managing artificial vegetation, *Hydrol. Process.*, 24, 3621–3630, 2010.

493 Li, X. R.: *Eco-hydrology of biological soil crusts in desert regions of China*, China Higher Education Press, 2012.

494 Liu, L., Li, S., Duan, Z., Wang, T., Zhang, Z., and Li, X.: Effects of microbiotic crusts on dew deposition in the  
495 artificial vegetation area at Shapotou, northwest China, *J. Hydrol.*, 328, 331–337, 2006.

496 Liu, L. C., Liu, Y. B., Hui, R., and Xie, M.: Recovery of microbial community structure of biological soil crusts in

497 successional stages of Shapotou desert revegetation, northwest China, *Soil Biol. Biochem.*, 107, 125–128, 2017.

498 Liu, Y., Li, X., Xing, Z., and Zhao, X.: Responses of soil microbial biomass and community composition to  
499 biological soil crusts in the revegetated areas of the Tengger Desert, *Appl. Soil Ecol.*, 65, 52–59, 2013.

500 Lozupone, C., and Knight, R.: UniFrac: a new phylogenetic method for comparing microbial communities, *Appl.*  
501 *Environ. Microbio.*, 71, 8228–8235, 2005.

502 Maier, S., Schmidt, T. S. B., Zheng, L., Peer, T., Wagner, V., and Grube, M.: Analyses of dryland biological soil  
503 crusts highlight lichens as an important regulator of microbial communities, *Biodivers Conserv.*, 23, 1735–1755,  
504 2014.

505 Moquin, S. A., Garcia, J. R., Brantley, S. L., Takacs-Vesbach, C. D., and Shepherd, U. L.: Bacterial diversity of  
506 bryophyte-dominant biological soil crusts and associated mites, *J. Arid Environ.*, 87, 110–117, 2012.

507 Nagy, M. L., Perez, A., and Garcia-Pichel, F.: The prokaryotic diversity of biological soil crusts in the Sonoran  
508 Desert (Organ Pipe Cactus National Monument, AZ), *FEMS Microbiol. Ecol.*, 54, 233–245, 2005.

509 Peterjohn, W. T., Melillo, J. M., and Steudler, P. A.: Responses of trace gas fluxes and N availability to  
510 experimentally elevated soil temperature, *Ecol. Appl.*, 4, 617–625, 1994.

511 Pointing, S. B., and Belnap, J.: Microbial colonization and controls in dryland systems, *Nat. Rev. Microbiol.*, 10,  
512 551–562, 2012.

513 **Rivera-Aguilar, V., Godínez-Alvarez, H., Moreno-Torres, R., and Rodríguez-Zaragoza, S.: Soil physico-chemical**  
514 **properties affecting the distribution of biological soil crusts along an environmental transect at Zapotitlán drylands,**  
515 **Mexico, *J. Arid Environ.*, 73, 1023–1028, 2009.**

516 Rustad, L. E., Campbell, J. L., Marion, G. M., Norby, R. J., Mitchell, M. J., Hartley, A. E., Cornelissen, J. H. C.,  
517 and Gurevitch, J.: A meta-analysis of the response of soil respiration, net nitrogen mineralization, and aboveground  
518 plant growth to experimental ecosystem warming, *Oecologia*, 126, 543–562, 2001.

519 **Root, H.T., and McCune, B.: Regional patterns of biological soil crust lichen species composition related to**  
520 **vegetation, soils, and climate in Oregon, USA, *J. Arid Environ.*, 79, 93–100, 2012.**

521 Sardans, J., Penuelas, J., and Estiarte, M.: Changes in soil enzymes related to C and N cycle and in soil C and N  
522 content under prolonged warming and drought in a Mediterranean shrubland, *Appl. Soil Ecol.*, 39, 223–235, 2008.

523 Steven, B., Gallegos-Graves, L. V., Belnap, J., and Kuske, C. R.: Dryland soil microbial communities display spatial  
524 biogeographic patterns associated with soil depth and soil parent material, *FEMS Microbiol. Ecol.*, 86, 1–13, 2013.

525 Wang, J., Bao, J., Su, J., Li, X., Chen, G., and Ma, X.: Impact of inorganic nitrogen additions on microbes in  
526 biological soil crusts, *Soil Biol. Biochem.*, 88, 303–313, 2015.

527 Weber, B., Büdel, B., and Belnap, J.: Biological Soil Crusts: An Organizing Principle in Drylands. Ecological studies  
528 226, Springer International Publishing Switzerland (outside the USA), 2016. DOI 10.1007/978-3-319-30214-0

529 Yeager, C. M., Kornosky, J. L., Housman, D. C., Grote, E. E., Belnap, J., and Kuske, C. R.: Diazotrophic community  
530 structure and function in two successional stages of biological soil crusts from the Colorado Plateau and  
531 Chihuahuan Desert, Appl. Environ. Microbiol., 70, 973–983, 2004.

532 Yu, J., Glazer, N., and Steinberger, Y.: Carbon utilization, microbial biomass, and respiration in biological soil crusts  
533 in the Negev Desert, Biol. Fertil. Soils, 50, 285–293, 2014.

534 Zhang, B., Kong, W., Wu, N., and Zhang, Y.: Bacterial diversity and community along the succession of biological  
535 soil crusts in the Gurbantunggut Desert, Northern China, Journal of basic microbiology, 56, 670–679, 2016.

536 Zhang, B. C., Zhang, Y. M., Zhao, J. C., and Wu, N.: Microalgal species variation at different successional stages  
537 in biological soil crusts of the Gurbantunggut Desert, Northwestern China, Biol. Fert. Soils, 45, 539–547, 2009.

538 Zhang, Y. M.: The microstructure and formation of biological soil crust in their early developmental stage, Chin.  
539 Sci. Bull., 50, 117–121, 2005.

540 Zhang, Y. M., Wu, N., Zhang, B. C., and Zhang, J.: Species composition, distribution patterns and ecological  
541 functions of biological soil crusts in the Gurbantunggut Desert, J. Arid Land, 2, 180–189, 2010.

542

543

544

545

546

547

548

549

550

551

552

553

554

555

556

557 **Table 1.** Percentages of the major classes in each age of BSCs. MS, 5YR, 15YR, 28YR, 34YR and 51YR represent  
 558 mobile sand, 5, 15, 28, 34 and 51-year-old BSCs, respectively.

| Dominant                   | MS       | 5YR      | 15YR     | 28YR     | 34YR     | 51YR     |
|----------------------------|----------|----------|----------|----------|----------|----------|
| <b>Bacilli</b>             | 68.73281 | 32.6217  | 10.87003 | 18.88014 | 14.65767 | 2.809922 |
| <b>Actinobacteria</b>      | 10.25572 | 17.22651 | 27.36705 | 28.34208 | 29.31533 | 30.65824 |
| <b>Alphaproteobacteria</b> | 4.058181 | 12.26026 | 19.93375 | 16.30594 | 18.98282 | 21.11772 |
| <b>Acidobacteria</b>       | 1.404514 | 2.372406 | 11.75488 | 8.32619  | 7.703847 | 9.022644 |
| <b>Chloroflexia</b>        | 0.886639 | 2.423301 | 4.006393 | 2.962606 | 3.367977 | 3.857281 |
| <b>Cyanobacteria</b>       | 0.112504 | 16.13272 | 3.943891 | 2.275974 | 2.367049 | 9.32444  |
| <b>Clostridia</b>          | 4.091218 | 1.661666 | 0.517876 | 1.017893 | 0.704489 | 0.15447  |
| <b>Cytophagia</b>          | 0.265188 | 1.223258 | 0.93039  | 0.739312 | 1.022358 | 1.579521 |
| <b>Deinococci</b>          | 0.048216 | 1.255402 | 0.342869 | 0.372335 | 0.249116 | 0.20715  |
| <b>Deltaproteobacteria</b> | 0.447337 | 0.740205 | 1.150934 | 0.993785 | 1.087539 | 1.255402 |
| <b>Gammaproteobacteria</b> | 5.715383 | 2.632237 | 1.011643 | 1.890246 | 1.417015 | 0.425908 |
| <b>Gemmatimonadetes</b>    | 0.645559 | 2.400979 | 2.406336 | 2.646523 | 2.75992  | 2.40455  |
| <b>Ktedonobacteria</b>     | 0.053573 | 0.113397 | 1.75542  | 1.121469 | 2.072395 | 1.657202 |
| <b>Sphingobacteriia</b>    | 0.262509 | 0.666095 | 1.200043 | 0.897353 | 0.995571 | 0.889317 |
| <b>Thermomicrobia</b>      | 0.449123 | 1.351834 | 3.24208  | 3.414408 | 3.008143 | 2.810815 |
| <b>Betaproteobacteria</b>  | 0.572342 | 0.789314 | 0.939319 | 1.021465 | 1.073253 | 1.11254  |
| <b>Minor</b>               | 0.018688 | 0.039555 | 0.080851 | 0.08194  | 0.081753 | 0.085887 |
| <b>Unclassified</b>        | 0.000911 | 0.00142  | 0.005018 | 0.005822 | 0.009866 | 0.02084  |

559

560

561 **Table 2.** Absolute abundances of bacteria (copies of ribosomal genes per gram of soil) in BSCs quantified by qPCR  
 562 (means  $\pm$  standard deviation, n = 6). MS, 5YR, 15YR, 28YR, 34YR and 51YR represent mobile sand, 5, 15, 28, 34  
 563 and 51-year-old BSCs, respectively.

| Dominant                  | MS                     | 5YR                    | 15YR                   | 28YR                   | 34YR                   | 51YR                   |
|---------------------------|------------------------|------------------------|------------------------|------------------------|------------------------|------------------------|
| <b>Bacteria abundance</b> | $1.12 \times 10^6 \pm$ | $3.94 \times 10^7 \pm$ | $2.70 \times 10^8 \pm$ | $5.44 \times 10^8 \pm$ | $7.61 \times 10^8 \pm$ | $9.03 \times 10^8 \pm$ |
|                           | $4.19 \times 10^5$ a   | $2.21 \times 10^6$ b   | $1.91 \times 10^7$ c   | $4.23 \times 10^7$ c   | $8.5 \times 10^7$ c    | $2.55 \times 10^7$ c   |

564 Means with different letters are significantly different ( $P < 0.05$ ).

565

566

567

568

569

570

571

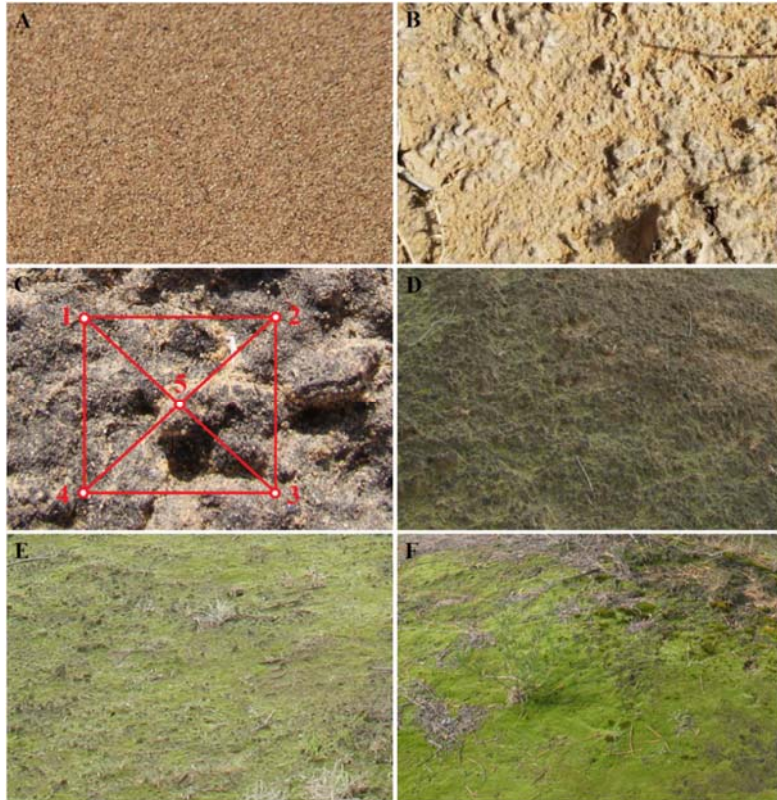

572

573 **Figure 1.** Sand dune landscape before (MS, A) and after establishing sand-binding vegetation with physical crusts  
 574 dominated by few cyanobacteria, revegetated in 2010 (5YR, B); with BSC dominated by cyanobacteria, revegetated  
 575 in 2000 (15YR, C); with BSC dominated by cyanobacteria and algae, revegetated in 1987 (28YR, D); with BSC  
 576 dominated by lichens, revegetated in 1981 (34YR, E); and with BSC dominated by mosses, revegetated in 1964  
 577 (51YR, F). Five soil cores (3.5-cm diameter) with crust layers from four vertices of a square (20-m length) and a  
 578 diagonal crossing point in each plot were sampled individually (as shown in C).

579

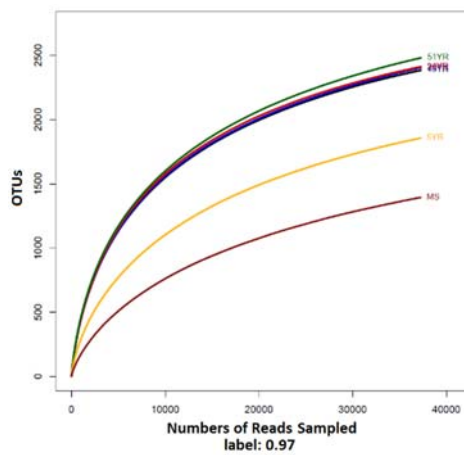

580

581 **Figure 2.** Rarefaction results of the 16S rDNA libraries based on 97 % similarity in different age of BSCs. MS, 5YR,  
 582 15YR, 28YR, 34YR and 51YR represent mobile sand, 5-, 15-, 28-, 34- and 51-year-old BSCs, respectively.

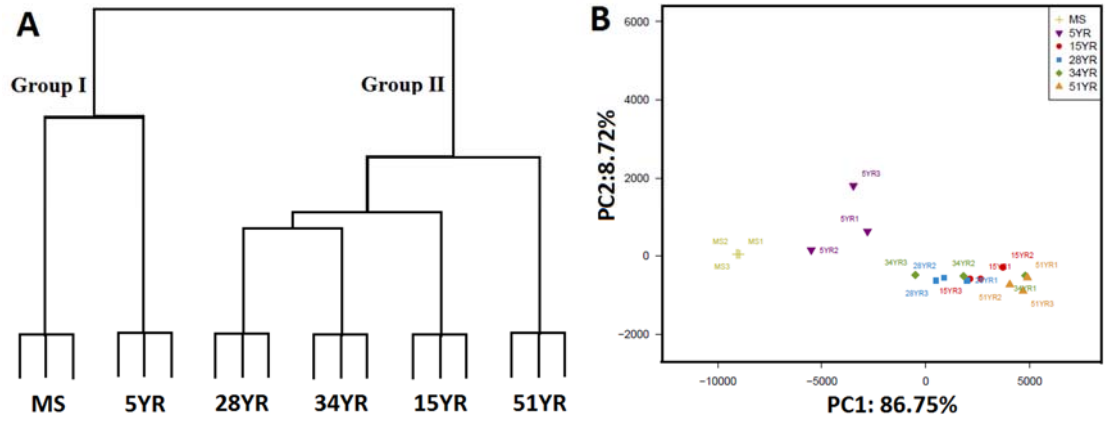

583

584 **Figure 3.** Hierarchical clustering analysis and PCA of bacterial communities in six different ages of BSCs at OTU

585 level based on 97 % similarity (triplicate samples for each age). MS, 5YR, 15YR, 28YR, 34YR and 51YR represent

586 mobile sand, 5-, 15-, 28-, 34- and 51-year-old BSCs, respectively.

587

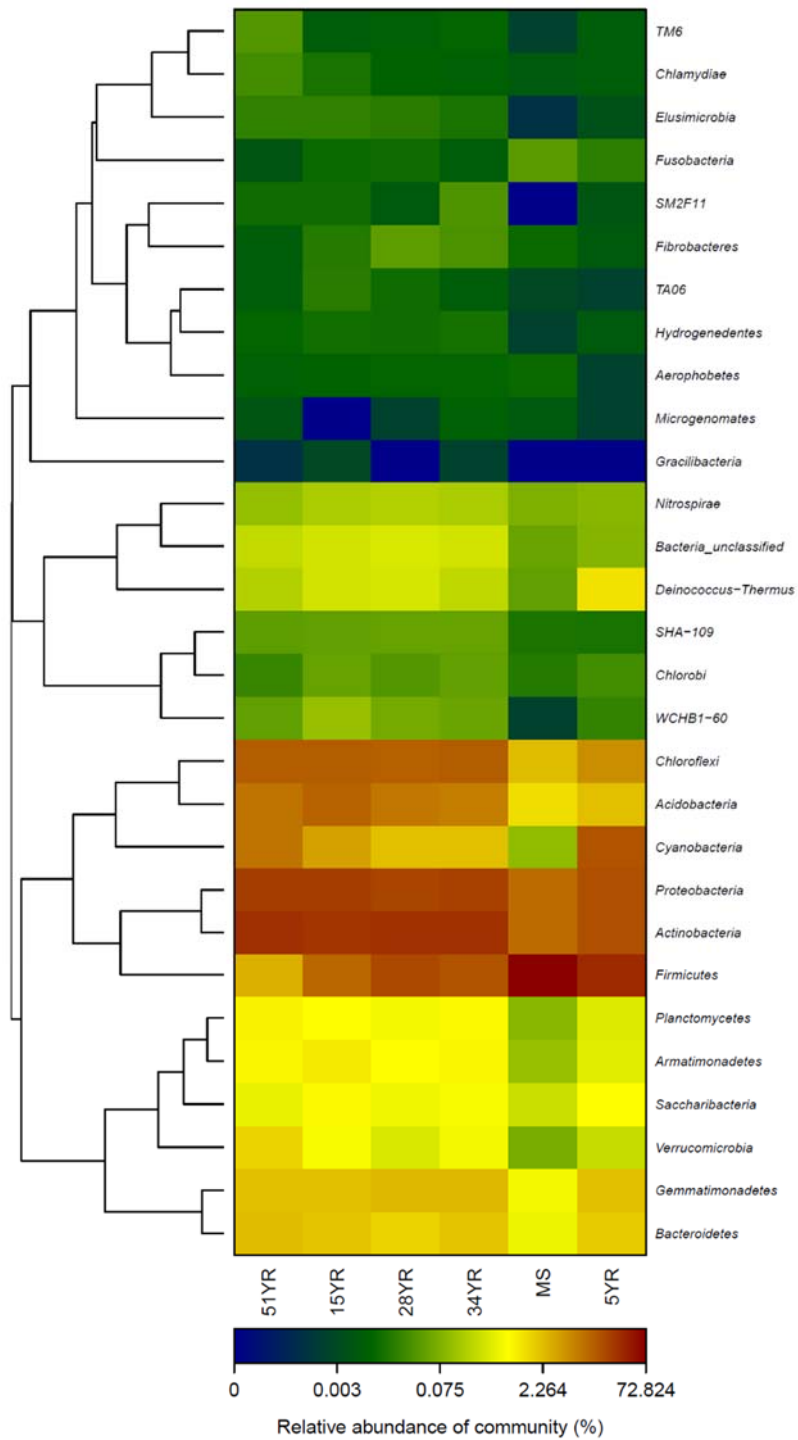

588

589 **Figure 4.** Heatmap of bacterial communities in different ages of BSCs at phylum level. MS, 5YR, 15YR, 28YR,

590 34YR and 51YR represent mobile sand, 5-, 15-, 28-, 34- and 51-year-old BSCs, respectively.

591

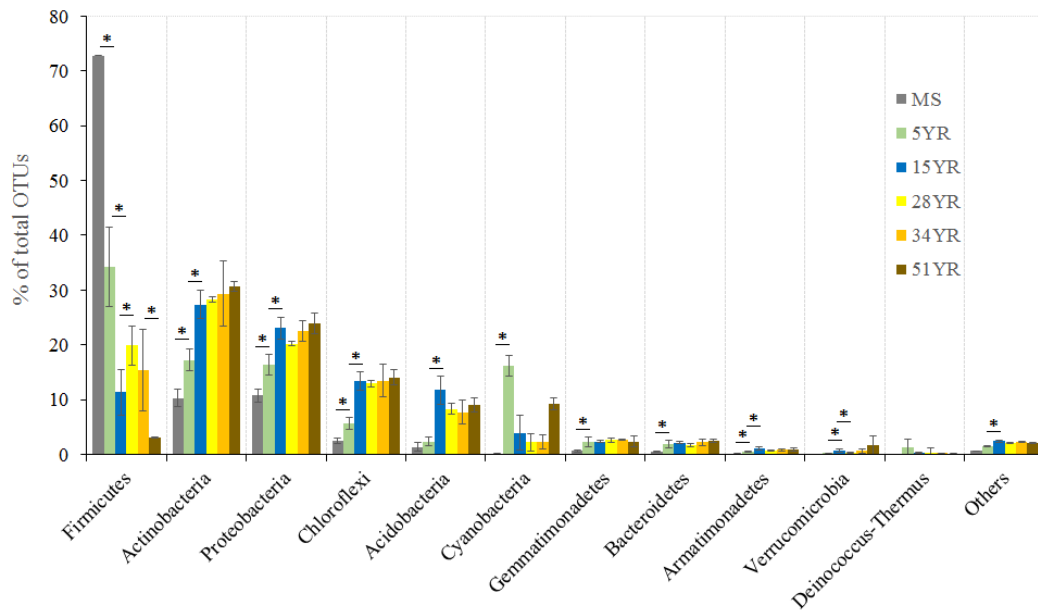

592

593 **Figure 5.** Abundant phyla (> 10 % of total OTUs) and low-abundance phyla (1 % < of total OTUs < 10 %) of  
 594 bacteria distributed in different ages of BSCs. Data are defined at a 3 % OTU genetic distance. Data are presented  
 595 as mean ± standard deviation; n = 3 per BSC sample. Paired t-test (BSC samples) was used to assess the significance  
 596 between adjacent ages of BSCs. \*P ≤ 0.05, \*\*P ≤ 0.001. MS, 5YR, 15YR, 28YR, 34YR and 51YR represent mobile  
 597 sand, 5, 15, 28, 34 and 51-year-old BSCs, respectively.

598

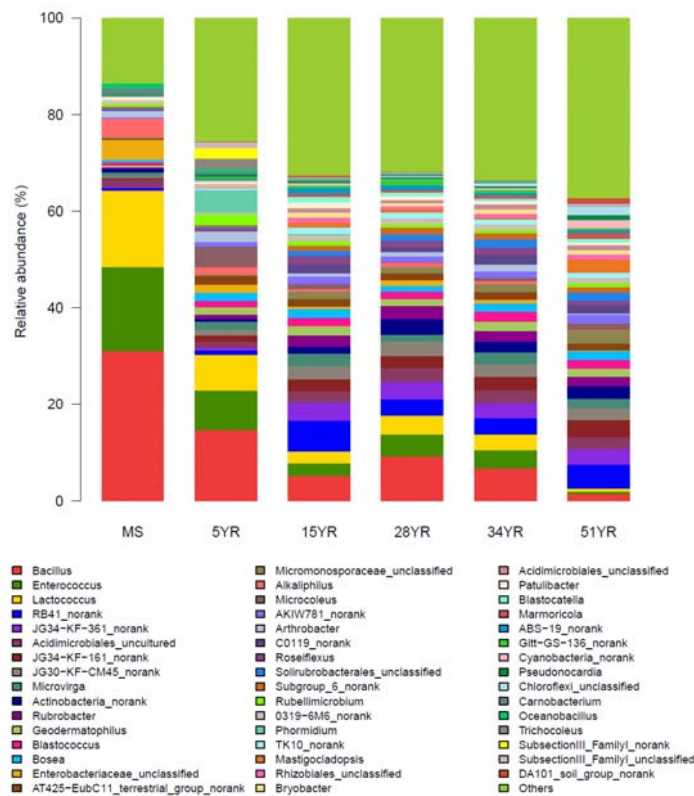

599



600 **Figure 6.** Bacterial community composition in six different ages of BSCs at the genus level. Data are defined at a  
 601 3 % OTU genetic distance. MS, 5YR, 15YR, 28YR, 34YR and 51YR represent mobile sand, 5, 15, 28, 34 and 51-  
 602 year-old BSCs, respectively.

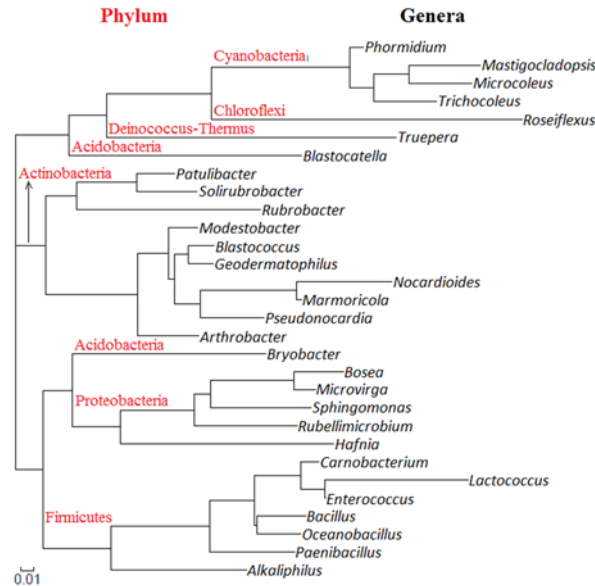

603  
 604 **Figure 7.** Phylogenetic relationship of the 30 most abundant genera in bacterial composition of BSCs.  
 605

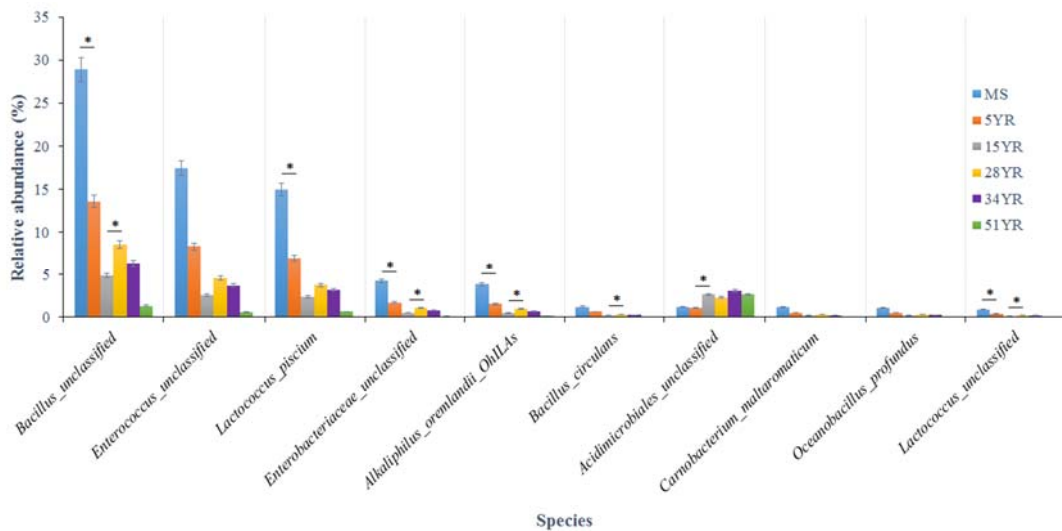

606  
 607 **Figure 8.** Abundant species (> 10 % of total OTUs) and low-abundance species (1 % < of total OTUs < 10 %) of  
 608 bacteria distributed in different ages of BSCs. Data are defined at a 3 % OTU genetic distance. Data are presented  
 609 as mean ± standard deviation; n = 3 per BSC samples; Paired t-tests (BSC samples) were used to assess the  
 610 significance between the adjacent ages of BSCs. \*P ≤ 0.05, \*\*P ≤ 0.001. MS, 5YR, 15YR, 28YR, 34YR and 51YR  
 611 represent mobile sand, 5, 15, 28, 34 and 51-year-old BSCs, respectively.  
 612

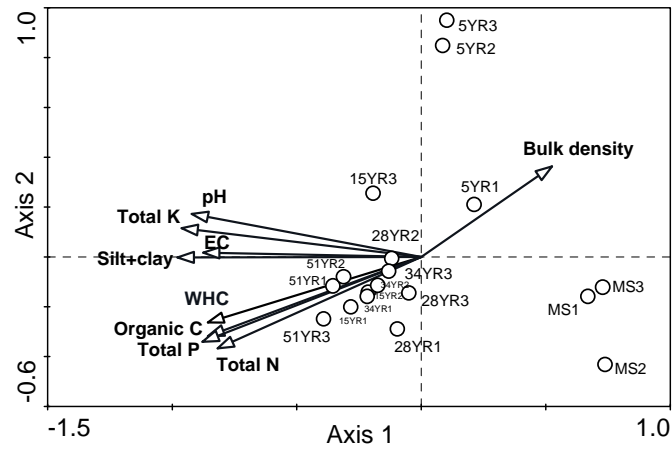

613

614 **Figure 9.** Redundancy analysis (RDA) of bacterial community structures in relation to soil physiochemical  
 615 properties. Arrows indicate the direction and magnitude of soil physiochemical index associated with bacterial  
 616 community structures. The length of arrows in the RDA plot correspond to the strength of the correlation between  
 617 variables and community structure. Each circle represents the bacterial community structure for each sample.
